# Supplementary material for: Quantification of the PO⋯HN hydrogen bond in the binding of creatinine with phosphonate calix[4]pyrroles
Source: Royal Society of Chemistry journal article supplement (doi:10.1039/d2qo01952c), 2023-01-01
Supplement: d2qo01952c1.pdf [file d2qo01952c1.pdf]

# Quantification of the P=O···HN hydrogen bond in the binding of creatinine with phosphonate calix[4]pyrroles.

*Andrés F. Sierra,<sup>1</sup> Gemma Aragay,<sup>1</sup> Rosa M. Gomila,<sup>2</sup> and Pablo Ballester.<sup>1,3</sup>*

<sup>1</sup>Institute of Chemical Research of Catalonia (ICIQ), The Barcelona Institute of Science and Technology, Avda. Països Catalans 16, 43007 Tarragona (Spain).

<sup>2</sup> Departament de Química, Universitat de les Illes Balears, Crta de Valldemossa km 7.5, 07122 Palma de Mallorca (Balears), (Spain).

<sup>3</sup>ICREA, Passeig Lluís Companys 23, 08018 Barcelona (Spain).

## Contents

|                                                                                                                                              |     |
|----------------------------------------------------------------------------------------------------------------------------------------------|-----|
| General methods and instrumentation .....                                                                                                    | S3  |
| Synthesis and characterization data .....                                                                                                    | S3  |
| <sup>1</sup> H and <sup>31</sup> P NMR titration experiments .....                                                                           | S4  |
| <b>3ii vs 2b</b> .....                                                                                                                       | S5  |
| <b>3io vs 2b</b> .....                                                                                                                       | S6  |
| <b>3oo vs 2b</b> .....                                                                                                                       | S7  |
| <b>1i vs 2b</b> .....                                                                                                                        | S8  |
| <b>4 vs 2b</b> .....                                                                                                                         | S9  |
| ITC Experiments.....                                                                                                                         | S10 |
| <b>3ii vs 2b</b> .....                                                                                                                       | S10 |
| <b>3io vs 2b</b> .....                                                                                                                       | S11 |
| <b>3oo vs 2b</b> .....                                                                                                                       | S12 |
| <b>1i vs 2b</b> .....                                                                                                                        | S13 |
| <b>4 vs 2b</b> .....                                                                                                                         | S14 |
| Estimation of hydrogen bond interaction energy.....                                                                                          | S15 |
| Computed energy minimized structures .....                                                                                                   | S16 |
| Cartesian coordinates of the full optimized structures for the free receptors and the corresponding inclusion complexes with <b>2b</b> ..... | S18 |
| Computed thermodynamic parameters of complexes <b>2b</b> ⊂ <b>3io</b> and <b>2b</b> ⊂ <b>3oo</b> .....                                       | S54 |
| References.....                                                                                                                              | S55 |

## General methods and instrumentation

Reagents and solvents used in the synthesis were obtained from commercial suppliers and were used without further purification unless otherwise stated. Pyrrole was distilled under vacuum and freshly used. THF and triethylamine (Et<sub>3</sub>N) were dried and distilled from sodium and CaH<sub>2</sub>, respectively, under argon atmosphere and freshly used. Flash column chromatography was performed with silica gel, technical grade, pore size 60 Å, and 230–400 mesh particle size. Automatic column chromatography purifications were done with a Combi-flash® RF+ Routine. <sup>1</sup>H, <sup>31</sup>P and <sup>13</sup>C NMR spectra were recorded on a Bruker Avance 400 (400 MHz for <sup>1</sup>H-NMR), Bruker Avance 500 (500 MHz for <sup>1</sup>H-NMR) ultra-shield spectrometer. Deuterated solvents were purchased from Aldrich.

Crystal structure determination was carried out using a Rigaku MicroMax-007HF diffractometer equipped with a PILATUS 200K detector and a Bruker Apex II Duo equipped with an APEX II detector, both using Mo K $\alpha$  radiation. Crystal structure solution was achieved using VLD and Patterson methods as implemented in SIR2014 v14.10. Least-squares refinement on F<sup>2</sup> using all measured intensities was carried out using the program SHELX-2018/3.

## Synthesis and characterization data

Cavitands were synthesized by following the published protocols.<sup>1,2</sup> Hexylcreatinine (**2b**) was also prepared using a known protocol.<sup>3</sup>

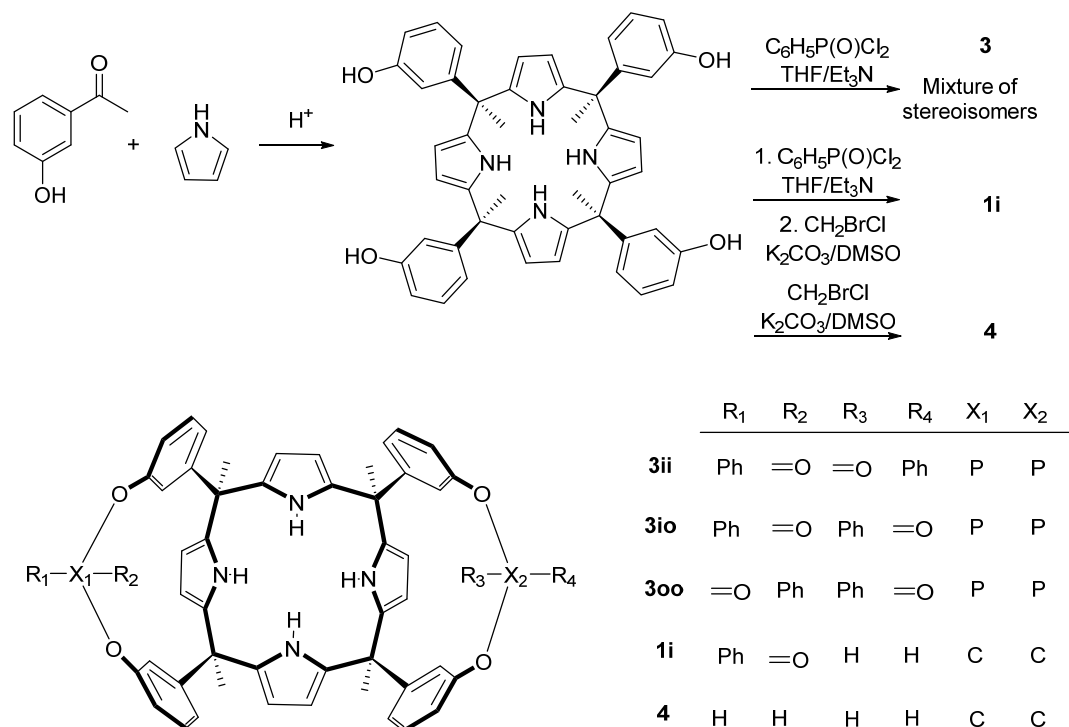

**Scheme S1** Reaction scheme for the preparation of the receptors **1i**, **3** and **4**.

### **<sup>1</sup>H and <sup>31</sup>P NMR titration experiments.**

We prepared a stock solution for each receptor (~ 2.0 mM) in CD<sub>2</sub>Cl<sub>2</sub>. A stock solution of **2b** (~ 12 mM) was prepared in methanol (HPLC grade) due to solubility issues. We placed different amounts of the solution of **2b** in small vials using high-precision Hamilton Glass microsyringes (33 μL for 0.5 equiv., 66 μL for 1 equiv., and 170 μL for 2.5 equiv.). The methanol was removed under reduced pressure and the residual solid was re-dissolved in 0.4 mL of the stock solution of each receptor. We sonicated the solution for five minutes and transferred it to an NMR tube to acquire the corresponding spectra.

### 3ii vs 2b

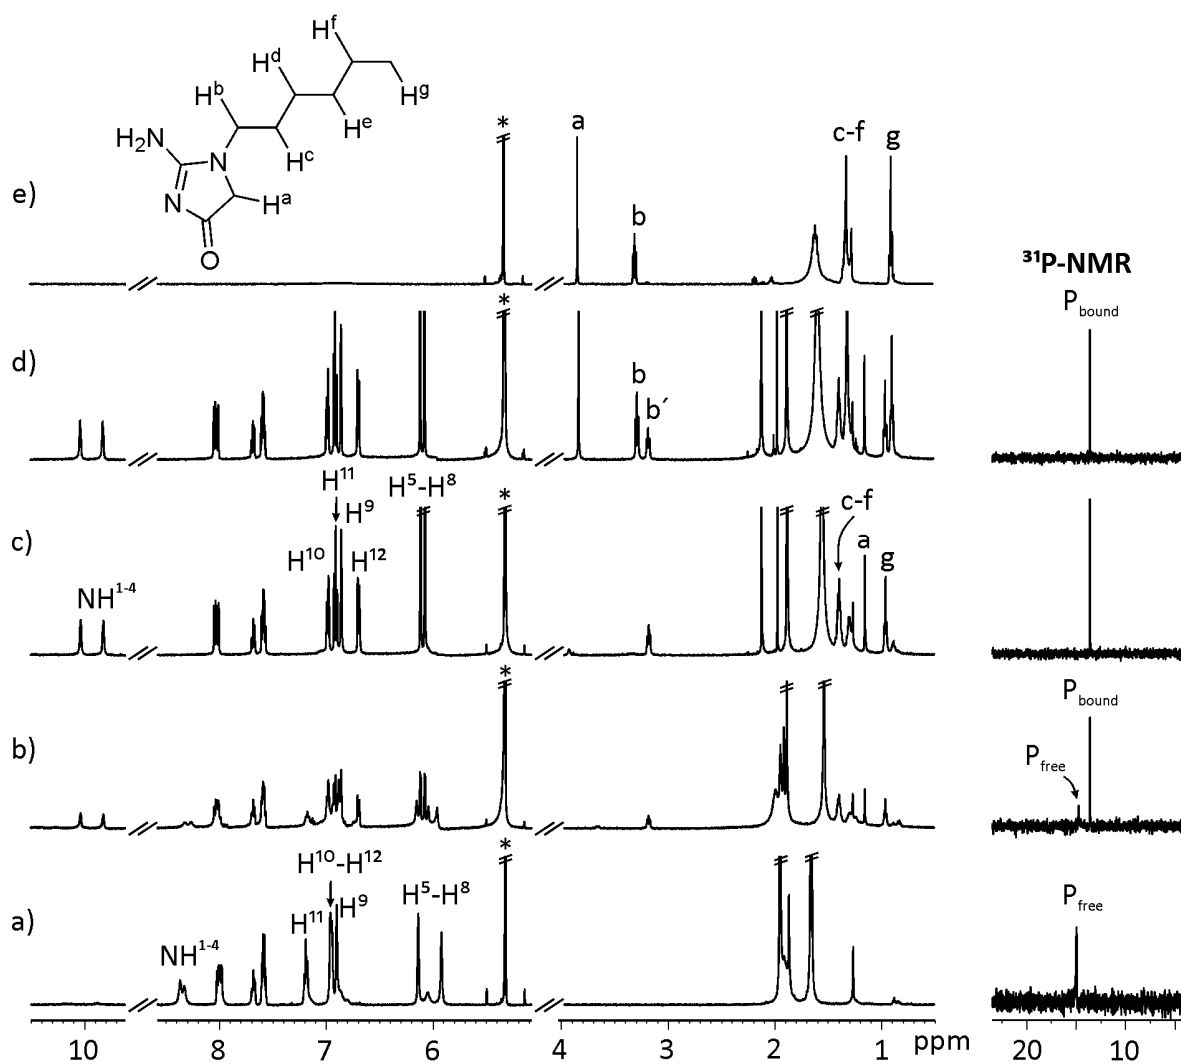

**Figure S1** Selected regions of the  $^1\text{H}$  NMR spectra (500 MHz, 298 K) (left panel) and the corresponding  $^{31}\text{P}$  NMR spectra (202 MHz, 298 K) (right panel) of  $\text{CD}_2\text{Cl}_2$  solutions containing receptor **3ii** and **2b** in different molar ratios: a) Free **3ii**; b) **3ii** + 0.5 equiv. of **2b**; c) **3ii** + 1.0 equiv. of **2b**; d) **3ii** + 2.5 equiv. of **2b**. Trace e) shows the same regions of the  $^1\text{H}$  NMR spectrum of **2b**. \* Residual solvent peak

### 3io vs 2b

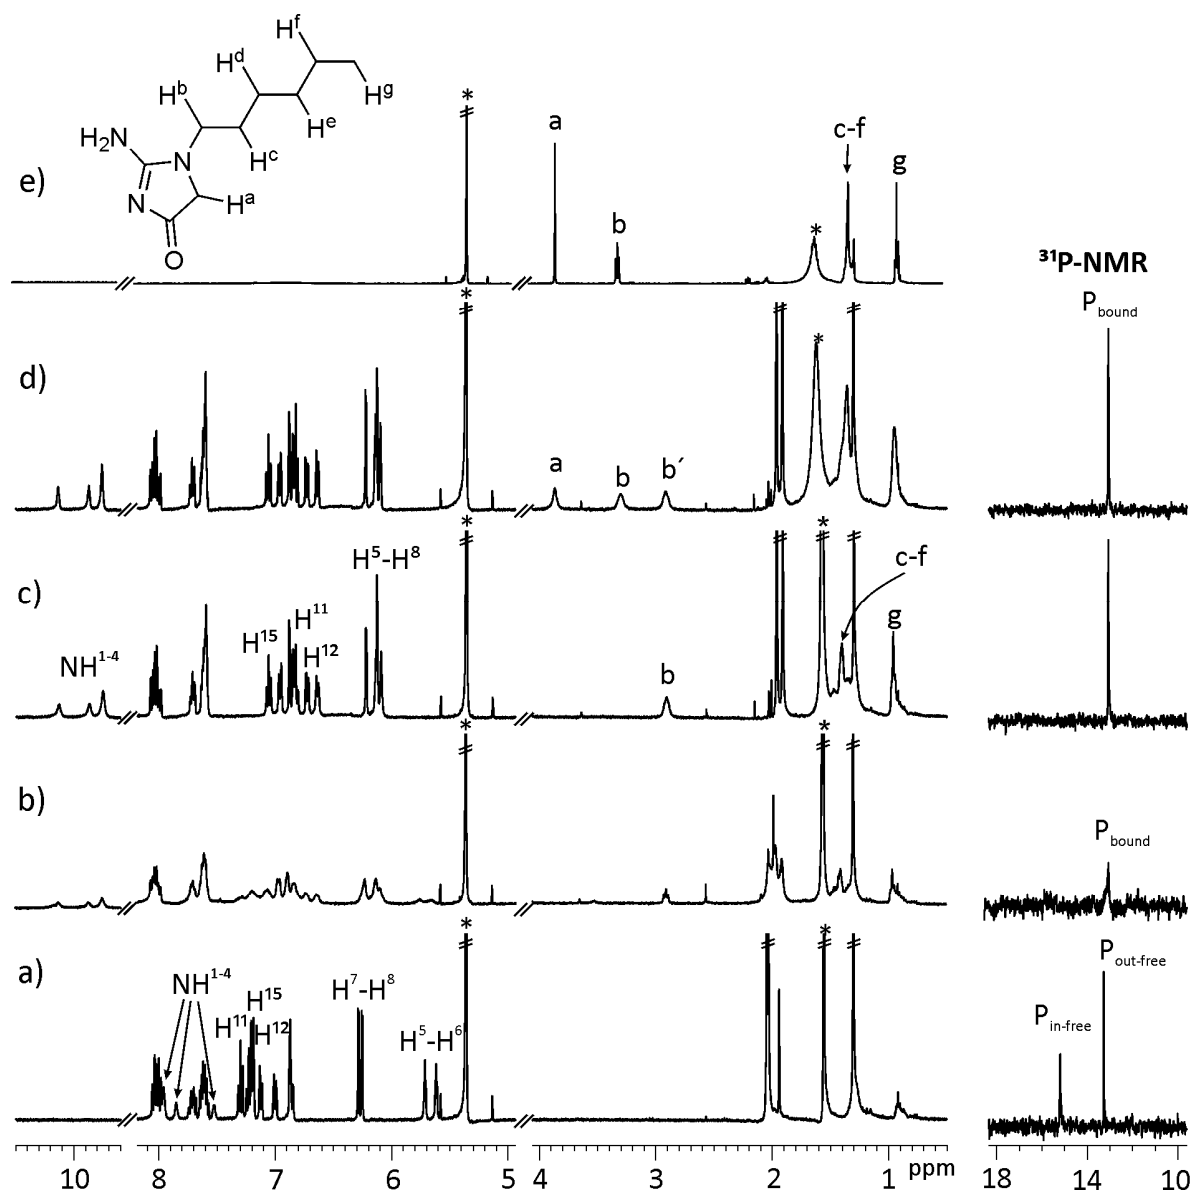

**Figure S2** Selected regions of the  $^1\text{H}$  NMR spectra (500 MHz, 298 K) (left panel) and the corresponding  $^{31}\text{P}$  NMR spectra (202 MHz, 298 K) (right panel) of  $\text{CD}_2\text{Cl}_2$  solutions containing receptor **3io** and **2b** in different molar ratios: a) Free **3io**; b) **3io** + 0.5 equiv. of **2b**; c) **3io** + 1.0 equiv. of **2b**; d) **3io** + 2.5 equiv. of **2b**. Trace e) shows the same regions of the  $^1\text{H}$  NMR spectrum of **2b**. \* Residual solvent peak

### 300 vs 2b

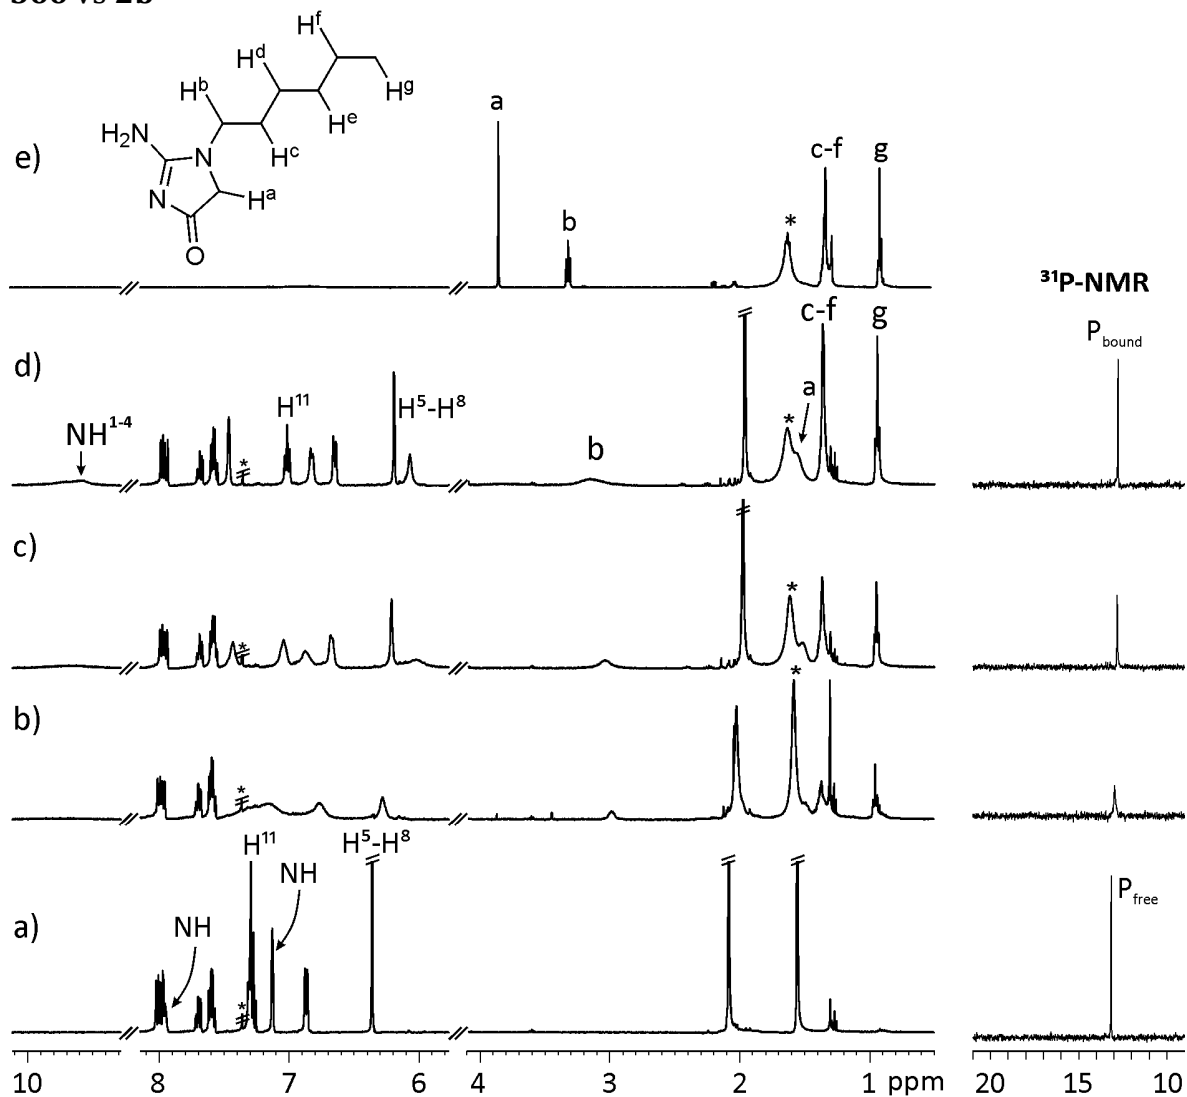

**Figure S 3.** Selected regions of the <sup>1</sup>H NMR spectra (500 MHz, 298 K) (left panel) and the corresponding <sup>31</sup>P NMR spectra (202 MHz, 298 K) (right panel) of CD<sub>2</sub>Cl<sub>2</sub> solutions containing receptor **300** and **2b** in different molar ratios: a) Free **300**; b) **300** + 0.5 equiv. of **2b**; c) **300** + 1.0 equiv. of **2b**; d) **300** + 2.5 equiv. of **2b**. Trace e) shows the same regions of the <sup>1</sup>H NMR spectrum of **2b**. \* Residual solvent peak.

## 1i vs 2b

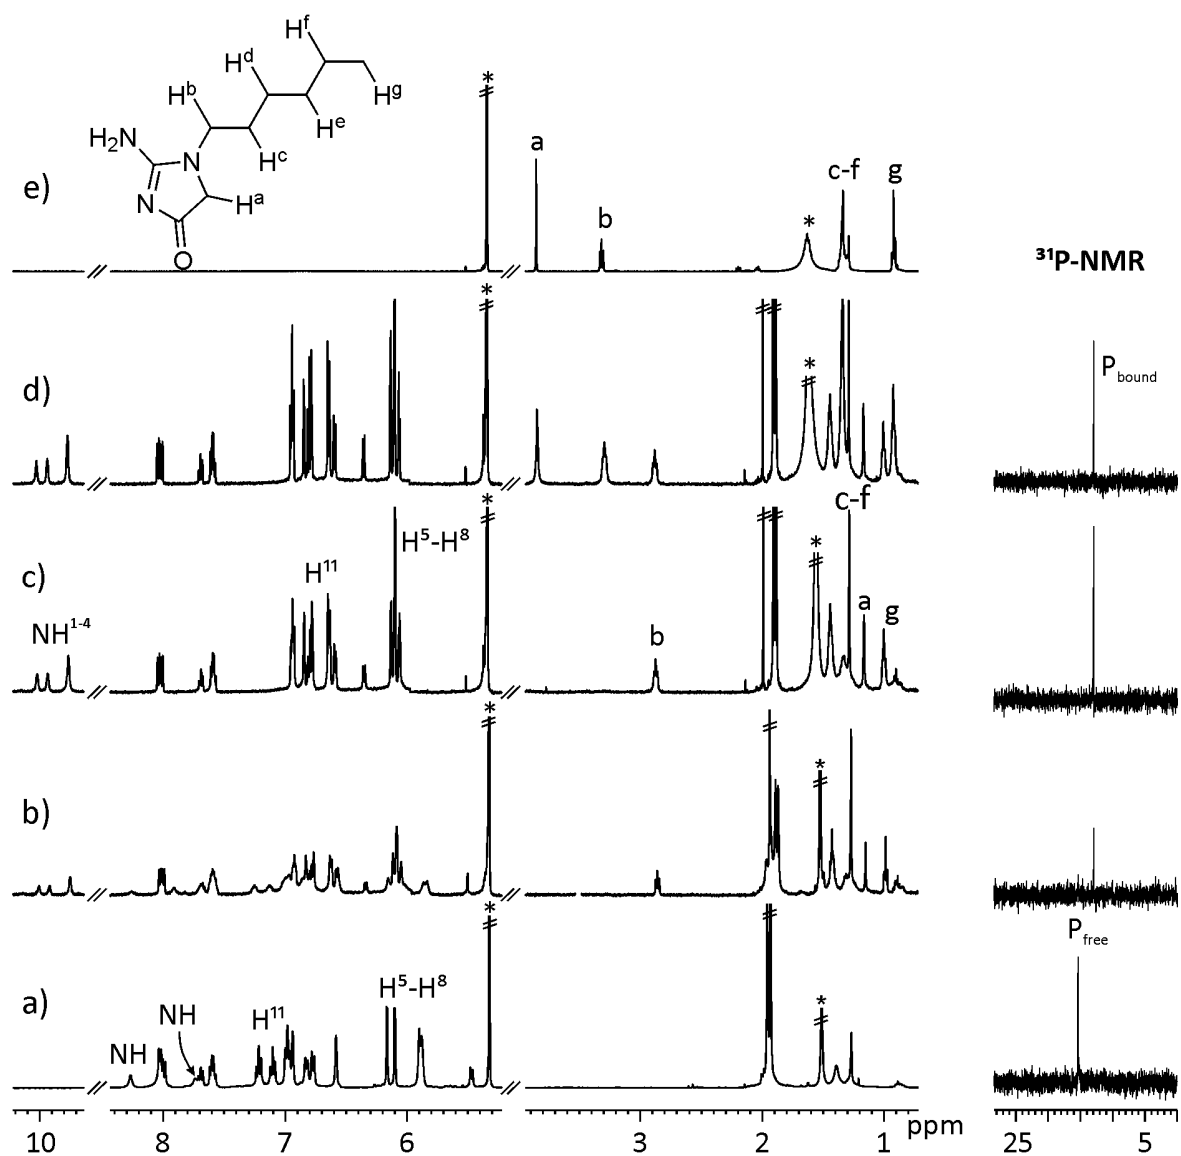

**Figure S4** Selected regions of the <sup>1</sup>H NMR spectra (500 MHz, 298 K) (left panel) and the corresponding <sup>31</sup>P NMR spectra (202 MHz, 298 K) (right panel) of CD<sub>2</sub>Cl<sub>2</sub> solutions containing receptor **1i** and **2b** in different molar ratios: a) Free **1i**; b) **1i** + 0.5 equiv. of **2b**; c) **1i** + 1.0 equiv. of **2b**; d) **1i** + 2.5 equiv. of **2b**. Trace e) shows the same regions of the <sup>1</sup>H NMR spectrum of **2b**. \* Residual solvent peak.



#### 4 vs 2b

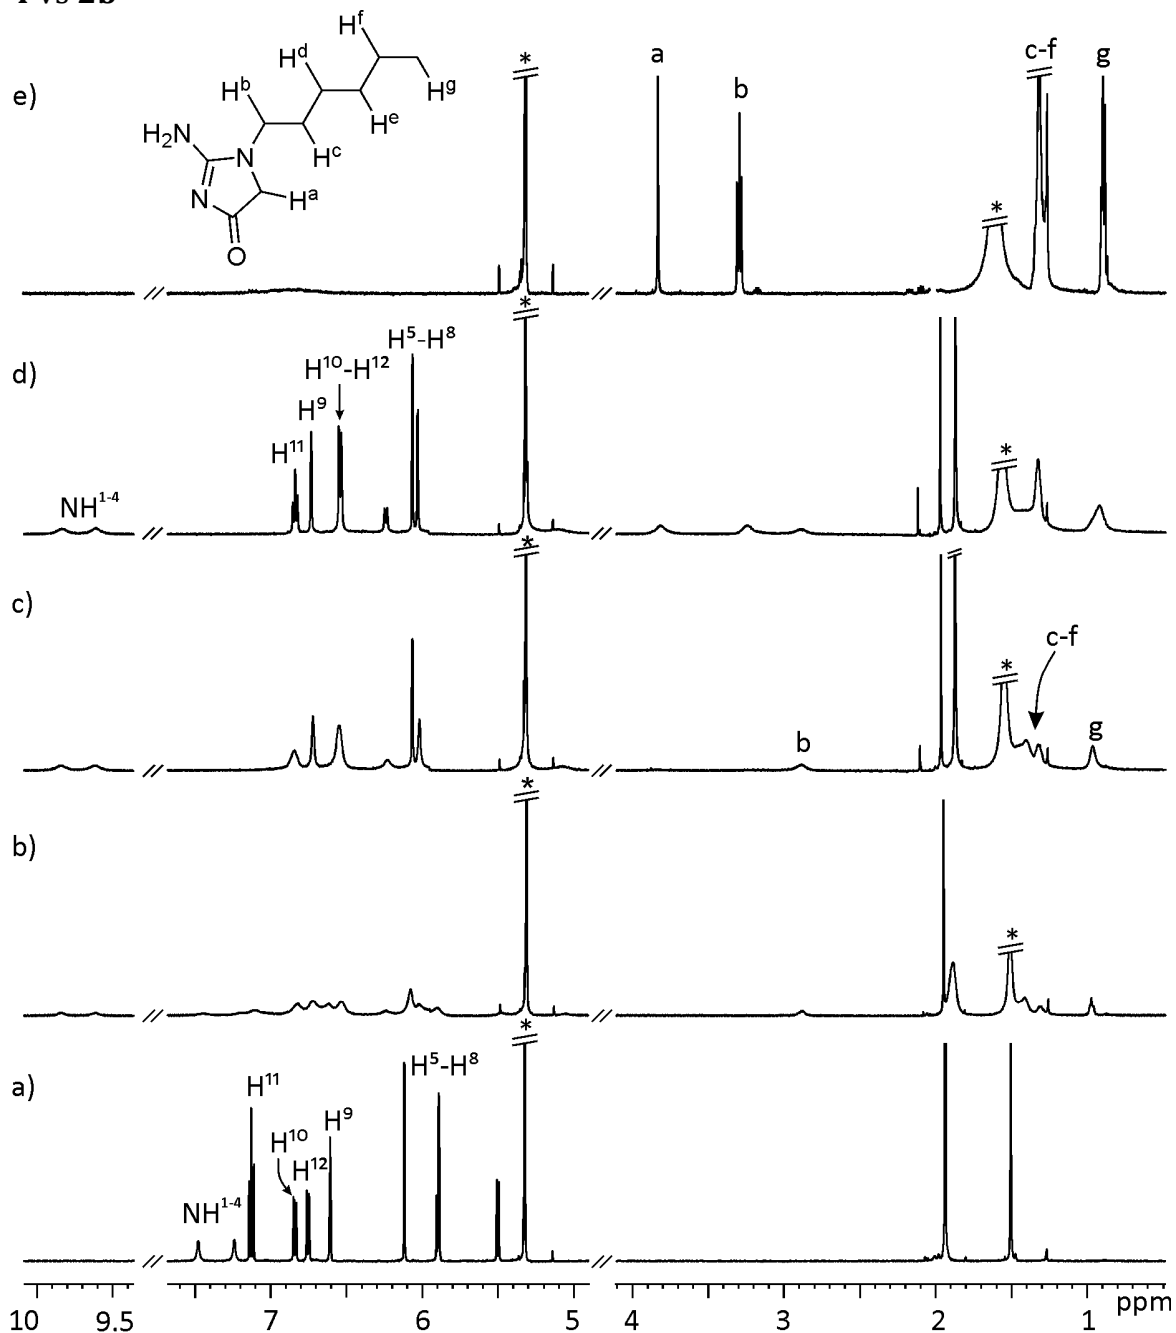

**Figure S5** Selected regions of the <sup>1</sup>H NMR spectra (500 MHz, 298 K) of CD<sub>2</sub>Cl<sub>2</sub> solutions containing receptor **4** and **2b** in different molar ratios: a) Free **4**; b) **4** + 0.5 equiv. of **2b**; c) **4** + 1.0 equiv. of **2b**; d) **4** + 2.5 equiv. of **2b**. Trace e) shows the same regions of the <sup>1</sup>H NMR spectrum of **2b**. \* Residual solvent peak.

## ITC Experiments

ITC experiments were performed in a MicroCal VP-ITC Micro Calorimeter with the VP Viewer 2000 software. Due to the low solubility of the hexyl creatinine **2b** in methylene chloride, reverse ITC experiments were performed. The concentration of the solution in the syringe was approximately seven to ten times more concentrated than the cell solution. The association constants and the thermodynamic parameters were obtained from the fit of the titration data to the “one set of sites” binding model implemented in the Microcal ITC Data Analysis module. The enthalpy of binding for each injection is plotted against the molar ratio of guest/host in the cell. The continuous line represents the least-squares-fit of the data to a single-site binding model.

### 3ii vs 2b

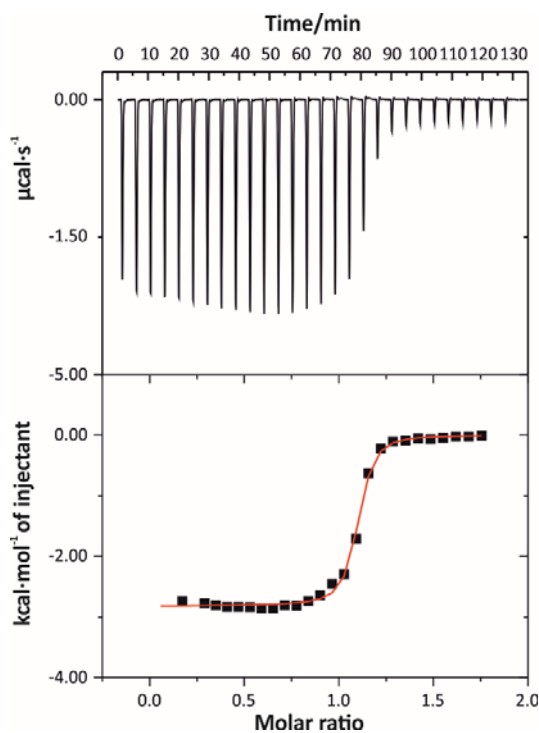

**Figure S6** Top) Raw data (heat vs. time) for the titration of **2b** with **3ii** in  $\text{CH}_2\text{Cl}_2$ . The titration was performed at 288 K. Bottom) Integrated data fitted to a theoretical binding isotherm (red line) for a 1:1 binding model.  $[\mathbf{2ii}] = 3.4 \text{ mM}$  over  $[\mathbf{2b}] = 0.4 \text{ mM}$ .

### 3io vs 2b

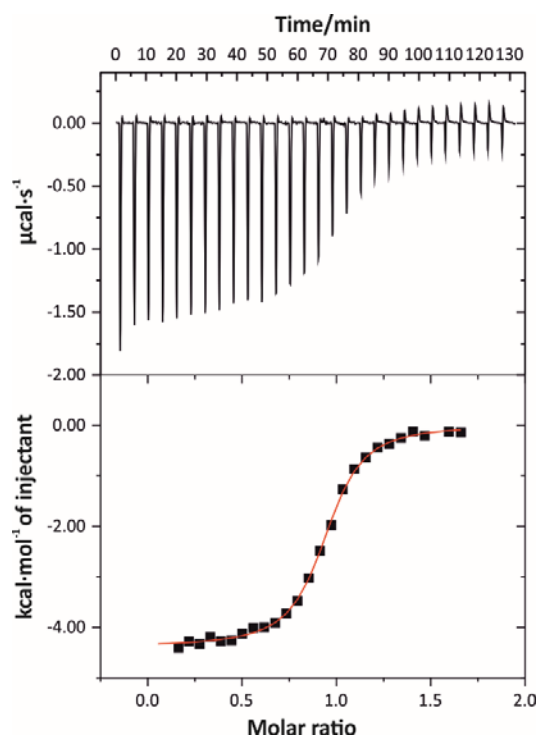

**Figure S7** Top) Raw data (heat vs. time) for the titration of **2b** with **3io** in  $\text{CH}_2\text{Cl}_2$ . The titration was performed at 288 K. Bottom) Integrated data fitted to a theoretical binding isotherm (red line) for a 1:1 binding model.  $[\mathbf{2io}] = 0.9 \text{ mM}$  over  $[\mathbf{2b}] = 0.1 \text{ mM}$ .

### 300 vs 2b

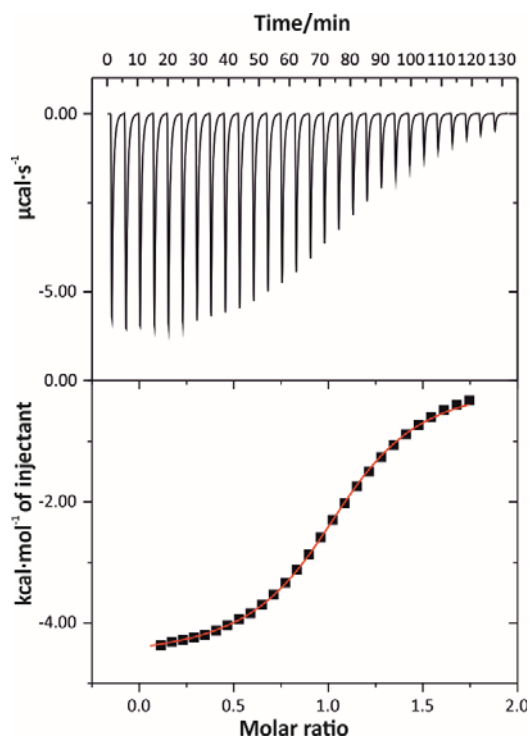

**Figure S8** Top) Raw data (heat vs. time) for the titration of **2b** with **300** in  $\text{CH}_2\text{Cl}_2$ . The titration was performed at 288 K. Bottom) Integrated data fitted to a theoretical binding isotherm (red line) for a 1:1 binding model.  $[\mathbf{200}] = 6.5 \text{ mM}$  over  $[\mathbf{2b}] = 0.8 \text{ mM}$ .

## 1i vs 2b

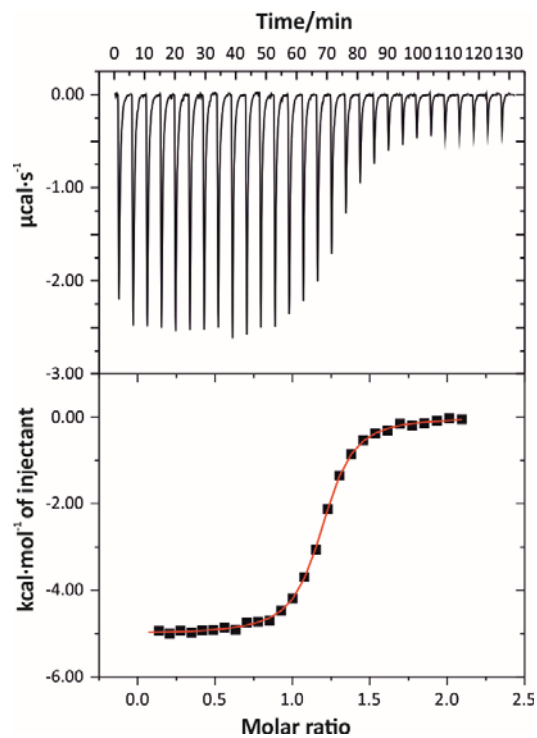

**Figure S9** Top) Raw data (heat vs. time) for the titration of **2b** with **1i** in  $\text{CH}_2\text{Cl}_2$ . The titration was performed at 288 K. Bottom) Integrated data fitted to a theoretical binding isotherm (red line) for a 1:1 binding model.  $[\mathbf{1i}] = 2 \text{ mM}$  over  $[\mathbf{2b}] = 0.2 \text{ mM}$ .

## 4 vs 2b

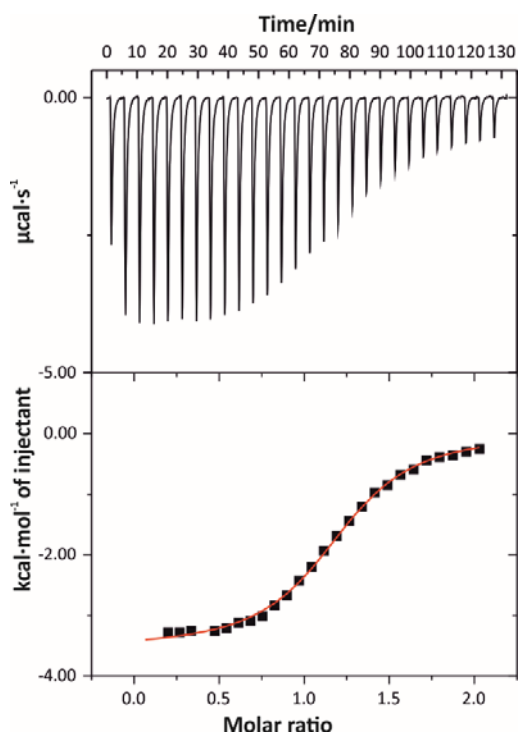

**Figure S10** Top) Raw data (heat vs. time) for the titration of **2b** with **4** in  $\text{CH}_2\text{Cl}_2$ . The titration was performed at 288 K. Bottom) Integrated data fitted to a theoretical binding isotherm (red line) for a 1:1 binding model.  $[\mathbf{4}] = 5.0 \text{ mM}$  over  $[\mathbf{2b}] = 0.5 \text{ mM}$ .

## Estimation of hydrogen bond interaction energy

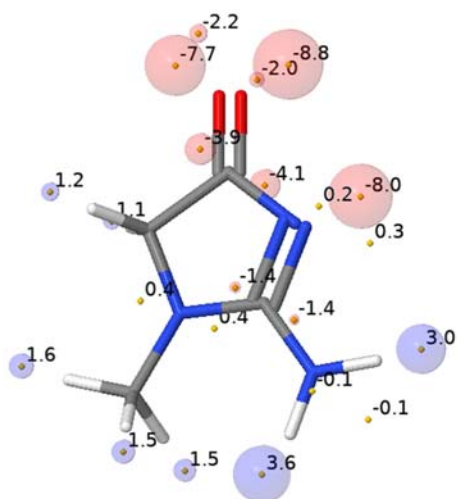

**Figure S 11.** Surface Site Interaction Point (SSIP) molecular descriptor of creatinine. Blue is used for positive SSIPs and red for negative SSIPs; the size of each sphere represents its magnitude. Image provided by Prof. Christopher A. Hunter, University of Cambridge.

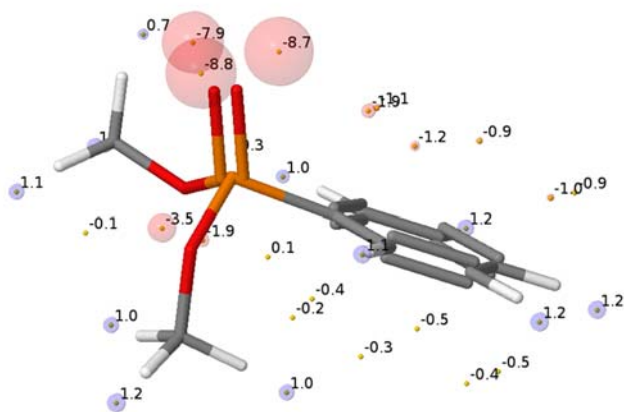

**Figure S 12.** Surface Site Interaction Point (SSIP) molecular descriptor of dimethylphenylphosphonate. Blue is used for positive SSIPs and red for negative SSIPs; the size of each sphere represents its magnitude. Image provided by Prof. Christopher A. Hunter, University of Cambridge.

## Computed energy minimized structures

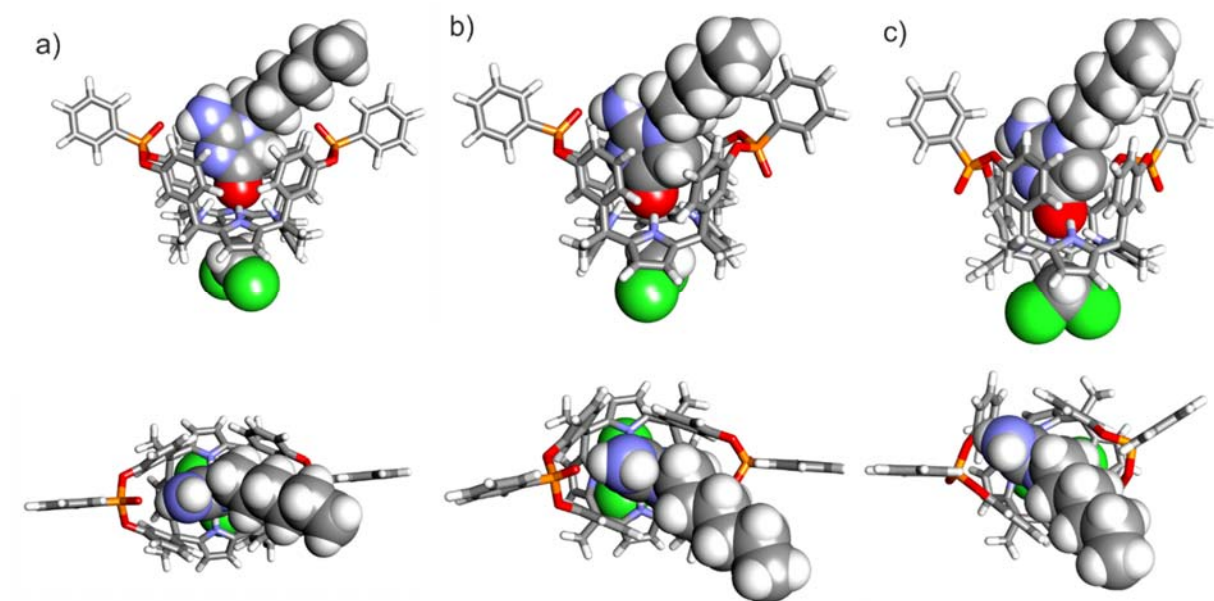

**Figure S 13.** Side and top views of the energy minimized structures of the **2b-3ii** (a), **2b-3io** (b) and **2b-3oo** (c) inclusion complexes at the RI-BP86-D3BJ-def2-SVP level of theory (solvent COSMO model as implemented in Turbomole version 7.0).



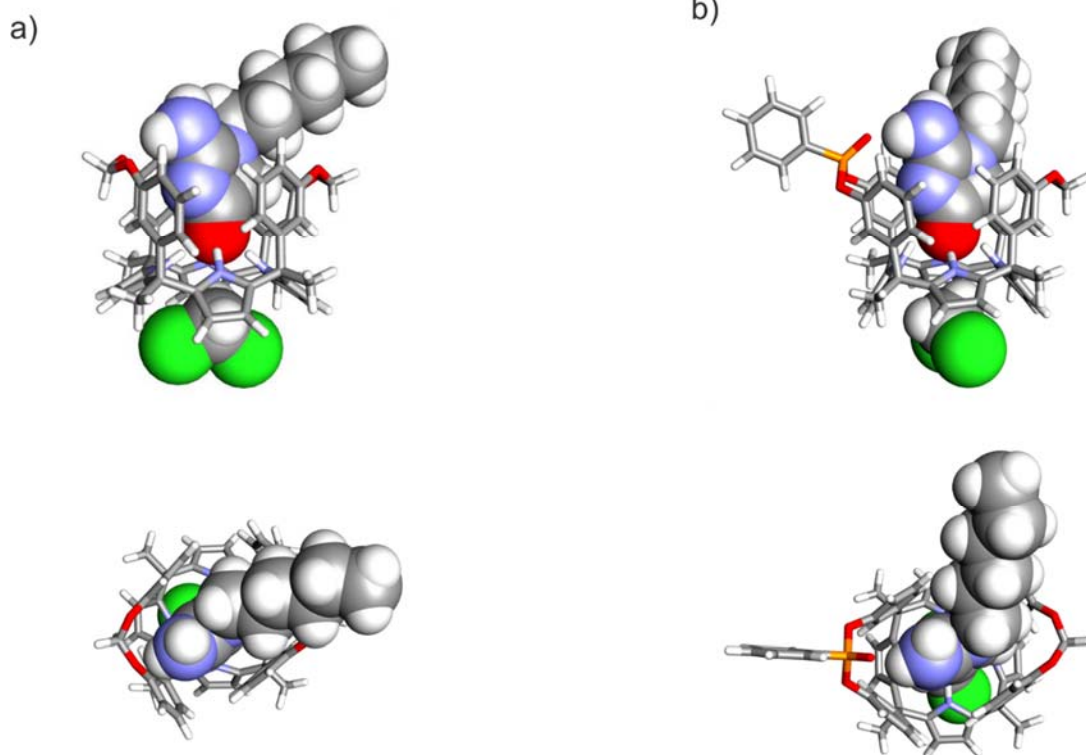

**Figure S 14.** Side and top views of the energy minimized structures of the **2b-4** (a) and **2b-1i** (b) inclusion complexes at the RI-BP86-D3BJ-def2-SVP level of theory (solvent COSMO model as implemented in Turbomole version 7.0).

**Cartesian coordinates of the full optimized structures for the free receptors and the corresponding inclusion complexes with 2b**

3ii

Energy = -4627.478111018

|   |            |            |            |
|---|------------|------------|------------|
| C | -4.2653467 | 0.4784972  | 3.4474994  |
| C | -4.8779800 | -0.3757123 | 2.4757939  |
| C | -2.9036440 | 0.5458675  | 3.1579203  |
| C | -3.8806061 | -0.8175956 | 1.6065147  |
| N | -2.6973358 | -0.2228074 | 2.0186590  |
| C | -1.7741974 | 1.2565538  | 3.8874740  |
| C | -1.4150940 | 2.5737392  | 3.2180474  |
| C | -3.9765383 | -1.7138618 | 0.3815237  |
| C | -4.0381073 | -0.8725686 | -0.8813895 |
| C | -0.5212738 | 3.8767046  | 1.5687379  |
| N | -2.9560865 | -0.1215430 | -1.3104247 |
| C | -3.2042698 | 0.4300002  | -2.5563762 |
| C | -5.0205733 | -0.7679740 | -1.8649426 |
| C | -4.4968922 | 0.0512214  | -2.9172298 |
| C | -2.1727601 | 1.2705614  | -3.2858219 |
| H | -4.7690673 | 0.9831391  | 4.2786219  |
| H | -5.9395075 | -0.6386942 | 2.4214546  |
| C | -2.2080726 | 1.5327939  | 5.3472121  |
| C | -5.2664849 | -2.5643037 | 0.4860197  |
| H | -6.0070784 | -1.2418772 | -1.8395077 |
| H | -5.0128794 | 0.3285164  | -3.8421215 |
| C | -0.8651029 | 0.4816423  | -3.5247832 |
| C | -2.7338218 | 1.6565542  | -4.6762145 |
| C | 0.0782623  | 4.1766004  | 0.2061250  |
| C | -0.9078118 | 3.8372752  | -0.8996460 |
| N | -0.9902355 | 2.5618886  | -1.4409386 |
| C | -1.8976158 | 2.5344939  | -2.4883378 |
| C | -1.8294584 | 4.6287561  | -1.5820244 |
| C | -2.4509409 | 3.8106492  | -2.5804871 |
| C | 1.3802477  | 3.3656729  | -0.0150636 |
| C | 0.4321298  | 5.6815764  | 0.1365803  |
| H | -2.0287317 | 5.6886795  | -1.3904395 |
| H | -3.2192090 | 4.1254946  | -3.2946429 |
| N | -1.0633705 | 2.6412787  | 1.8800269  |
| C | -1.1105295 | 3.8164060  | 3.7746667  |
| C | -0.5494620 | 4.6335237  | 2.7400332  |
| H | -1.2410045 | 4.0969809  | 4.8247754  |
| H | -0.1849324 | 5.6601642  | 2.8475349  |
| C | -0.5083673 | 0.3616418  | 3.9334548  |

|   |            |            |            |
|---|------------|------------|------------|
| C | 0.7794782  | 0.9311493  | 3.9126413  |
| C | -0.6235895 | -1.0381811 | 4.0363654  |
| C | 1.9258247  | 0.1229421  | 3.9405649  |
| C | 0.5296571  | -1.8333849 | 4.0611655  |
| C | 1.8138064  | -1.2733562 | 3.9972111  |
| H | 0.8806938  | 2.0247113  | 3.8776050  |
| H | -1.6069364 | -1.5243018 | 4.0993441  |
| H | 2.9234188  | 0.5867067  | 3.9176673  |
| H | 2.6996403  | -1.9224098 | 4.0010763  |
| C | -2.7952308 | -2.7065488 | 0.2738980  |
| C | -2.3856539 | -3.1727961 | -0.9933128 |
| C | -2.1872890 | -3.2521398 | 1.4215831  |
| C | -1.3784997 | -4.1416932 | -1.1173633 |
| C | -1.1889624 | -4.2288363 | 1.2831226  |
| C | -0.7615077 | -4.6744976 | 0.0243464  |
| C | 0.3106274  | 1.1764913  | -3.8747036 |
| C | -0.8376141 | -0.9269796 | -3.5131202 |
| C | 1.4739060  | 0.4686255  | -4.2042635 |
| C | 0.3394871  | -1.6252020 | -3.8325541 |
| C | 1.5094260  | -0.9342464 | -4.1788178 |
| C | 1.9530203  | 3.3262101  | -1.3035312 |
| C | 2.0264852  | 2.6809967  | 1.0291711  |
| H | -2.8833025 | -2.7832991 | -1.8926035 |
| H | -2.5032404 | -2.9467076 | 2.4287379  |
| O | -0.6344707 | -4.8062255 | 2.4302962  |
| H | 0.0339449  | -5.4286541 | -0.0472119 |
| H | 0.3252291  | 2.2746506  | -3.9186514 |
| H | -1.7539848 | -1.4812688 | -3.2717558 |
| H | 0.3457221  | -2.7253630 | -3.8162862 |
| H | 2.4410948  | -1.4612510 | -4.4227347 |
| C | 3.2044641  | 1.9548463  | 0.7911986  |
| C | 3.1333816  | 2.6063246  | -1.5252176 |
| C | 3.7721899  | 1.9073851  | -0.4880877 |
| H | 1.4866583  | 3.8521496  | -2.1489698 |
| H | 1.5928085  | 2.7010792  | 2.0353249  |
| H | 3.6801190  | 1.4028157  | 1.6147872  |
| H | 4.6829107  | 1.3316645  | -0.6969195 |
| H | -1.3742157 | 1.9881800  | 5.9137578  |
| H | -2.4908466 | 0.5852901  | 5.8431151  |
| H | -3.0715323 | 2.2250243  | 5.3796816  |
| H | -5.2441883 | -3.1714443 | 1.4103684  |
| H | -5.3471459 | -3.2434601 | -0.3833893 |
| H | -6.1655090 | -1.9191728 | 0.5089734  |
| H | -2.0069055 | 2.2921130  | -5.2156844 |
| H | -3.6848614 | 2.2146193  | -4.5799124 |
| H | -2.9212677 | 0.7455317  | -5.2757508 |

|    |            |            |            |
|----|------------|------------|------------|
| H  | 0.8370285  | 5.9332947  | -0.8613875 |
| H  | 1.1957593  | 5.9289355  | 0.8979751  |
| H  | -0.4623687 | 6.3066743  | 0.3231371  |
| O  | 2.5872029  | 1.1936108  | -4.6307321 |
| O  | 3.6906858  | 2.6589624  | -2.8033737 |
| O  | 0.3715241  | -3.2155808 | 4.1957900  |
| H  | -1.0726950 | -4.4908151 | -2.1148483 |
| H  | -1.7706156 | -0.5005350 | 1.6778609  |
| H  | -2.0503263 | -0.0867610 | -0.8339773 |
| H  | -0.3005090 | 1.8250300  | -1.2603285 |
| H  | -1.2557994 | 1.9105324  | 1.1937883  |
| P  | 3.9825776  | 1.3399311  | -3.7544948 |
| P  | 0.8189986  | -4.2751219 | 3.0121877  |
| O  | 1.7374676  | -3.7080231 | 1.9625464  |
| O  | 4.4343450  | 0.0973265  | -3.0400714 |
| C  | 1.3966945  | -5.6885701 | 3.9474751  |
| C  | 5.0887809  | 2.0455969  | -4.9778586 |
| C  | 0.6573655  | -6.2085642 | 5.0319380  |
| C  | 2.6275663  | -6.2640846 | 3.5717986  |
| C  | 4.7678930  | 3.2341267  | -5.6682749 |
| C  | 6.3055999  | 1.3781190  | -5.2225544 |
| H  | 1.1794675  | -2.3330181 | 0.5392024  |
| C  | 0.9991400  | -1.6400030 | -0.3062801 |
| Cl | 0.1596578  | -0.1719135 | 0.3986557  |
| H  | 0.3120269  | -2.0423745 | -1.0698483 |
| Cl | 2.5285488  | -1.1871944 | -1.0613205 |
| C  | 1.1588320  | -7.3122359 | 5.7364403  |
| C  | 3.1190034  | -7.3688770 | 4.2846946  |
| C  | 2.3863016  | -7.8913048 | 5.3640332  |
| C  | 7.2050590  | 1.9021671  | -6.1643502 |
| C  | 5.6732755  | 3.7487038  | -6.6072232 |
| C  | 6.8890053  | 3.0843055  | -6.8552007 |
| H  | -0.2994901 | -5.7533009 | 5.3265355  |
| H  | 3.1922960  | -5.8412128 | 2.7278287  |
| H  | 3.8193881  | 3.7547758  | -5.4707586 |
| H  | 6.5394094  | 0.4545495  | -4.6720639 |
| H  | 0.5898801  | -7.7220674 | 6.5841898  |
| H  | 4.0797118  | -7.8207380 | 3.9963211  |
| H  | 2.7750113  | -8.7561763 | 5.9226363  |
| H  | 8.1568488  | 1.3850629  | -6.3575149 |
| H  | 5.4304624  | 4.6752514  | -7.1487796 |
| H  | 7.5954986  | 3.4934926  | -7.5932391 |

## 2bC3ii

Energy = -5219.915754727

|   |            |            |            |
|---|------------|------------|------------|
| C | -4.4273773 | 0.5733974  | 3.9944298  |
| C | -5.2196798 | -0.1739220 | 3.0636200  |
| C | -3.1061565 | 0.5426950  | 3.5423499  |
| C | -4.3655282 | -0.6415198 | 2.0609358  |
| N | -3.0981131 | -0.1848864 | 2.3682643  |
| C | -1.8293903 | 1.1195311  | 4.1395636  |
| C | -1.5417221 | 2.4905205  | 3.5573715  |
| C | -4.6223302 | -1.5371522 | 0.8597026  |
| C | -4.6779944 | -0.7350217 | -0.4271058 |
| C | -1.0680386 | 4.0231865  | 1.9482803  |
| N | -3.6291257 | 0.0680550  | -0.8368790 |
| C | -3.8752642 | 0.5801587  | -2.0982835 |
| C | -5.6320933 | -0.7189198 | -1.4449880 |
| C | -5.1268599 | 0.1083428  | -2.4968094 |
| C | -2.8925450 | 1.4875846  | -2.8164616 |
| H | -4.7844088 | 1.0736442  | 4.9006812  |
| H | -6.2969593 | -0.3602327 | 3.1262085  |
| C | -2.0117752 | 1.2672175  | 5.6707097  |
| C | -5.9719145 | -2.2680811 | 1.0550558  |
| H | -6.5922522 | -1.2448298 | -1.4347316 |
| H | -5.6354545 | 0.3453770  | -3.4368405 |
| C | -1.5304853 | 0.7936870  | -3.0629498 |
| C | -3.4839930 | 1.8445530  | -4.2029950 |
| C | -0.6706185 | 4.5243760  | 0.5728076  |
| C | -1.6796203 | 4.1303931  | -0.4927816 |
| N | -1.7432921 | 2.8462883  | -1.0066783 |
| C | -2.6663466 | 2.7739863  | -2.0347336 |
| C | -2.6049666 | 4.8972571  | -1.2038390 |
| C | -3.2260160 | 4.0449221  | -2.1720572 |
| C | 0.7346140  | 3.9917357  | 0.1984520  |
| C | -0.5688755 | 6.0682817  | 0.6161352  |
| H | -2.8040930 | 5.9633834  | -1.0545115 |
| H | -3.9955984 | 4.3317077  | -2.8956997 |
| N | -1.3084421 | 2.6868938  | 2.2085192  |
| C | -1.4626908 | 3.7391662  | 4.1752822  |
| C | -1.1633587 | 4.7033947  | 3.1624219  |
| H | -1.6158717 | 3.9411626  | 5.2401546  |
| H | -1.0377670 | 5.7812165  | 3.3064388  |
| C | -0.6611985 | 0.1301021  | 3.9100676  |
| C | 0.6122354  | 0.5337613  | 3.4655031  |
| C | -0.8600374 | -1.2261562 | 4.2358508  |
| C | 1.6610119  | -0.3969689 | 3.3533925  |

|   |            |            |            |
|---|------------|------------|------------|
| C | 0.1958240  | -2.1368752 | 4.1399800  |
| C | 1.4683421  | -1.7435259 | 3.6967331  |
| H | 0.7874149  | 1.5870053  | 3.2090494  |
| H | -1.8378723 | -1.5805969 | 4.5912047  |
| H | 2.6493434  | -0.0633538 | 3.0030281  |
| H | 2.2795717  | -2.4805237 | 3.6289539  |
| C | -3.5133961 | -2.6138111 | 0.7749905  |
| C | -3.0174772 | -3.0706196 | -0.4603268 |
| C | -3.0250645 | -3.1984985 | 1.9581971  |
| C | -2.0425722 | -4.0794569 | -0.5112874 |
| C | -2.0611598 | -4.2079250 | 1.8915171  |
| C | -1.5521168 | -4.6631265 | 0.6659131  |
| C | -0.4573745 | 1.5638186  | -3.5612066 |
| C | -1.3358566 | -0.5871682 | -2.8731503 |
| C | 0.7547660  | 0.9478554  | -3.8926014 |
| C | -0.1075122 | -1.1921794 | -3.1914843 |
| C | 0.9453632  | -0.4337336 | -3.7213633 |
| C | 1.1224020  | 3.9160813  | -1.1532508 |
| C | 1.6777436  | 3.6650599  | 1.1938214  |
| H | -3.4136938 | -2.6374407 | -1.3901540 |
| H | -3.3952765 | -2.8752813 | 2.9411022  |
| O | -1.6665569 | -4.8016733 | 3.1013400  |
| H | -0.7913069 | -5.4544532 | 0.6441258  |
| H | -0.5667167 | 2.6471913  | -3.7124624 |
| H | -2.1515300 | -1.1994830 | -2.4694166 |
| H | 0.0275153  | -2.2717464 | -3.0289285 |
| H | 1.9021917  | -0.8909592 | -4.0043931 |
| C | 2.9826173  | 3.2767896  | 0.8440134  |
| C | 2.4251727  | 3.5288295  | -1.4889613 |
| C | 3.3712518  | 3.2034401  | -0.5031620 |
| H | 0.4153645  | 4.1697988  | -1.9542878 |
| H | 1.3852363  | 3.7341483  | 2.2518493  |
| H | 3.7088980  | 3.0255716  | 1.6318432  |
| H | 4.3837832  | 2.8951013  | -0.7949144 |
| H | -1.0815692 | 1.6539034  | 6.1287039  |
| H | -2.2525961 | 0.2887105  | 6.1264006  |
| H | -2.8333376 | 1.9719014  | 5.9009339  |
| H | -5.9592921 | -2.8452632 | 1.9986618  |
| H | -6.1520491 | -2.9684941 | 0.2179060  |
| H | -6.8085802 | -1.5434223 | 1.0919853  |
| H | -2.8070307 | 2.5286051  | -4.7477394 |
| H | -4.4665450 | 2.3415371  | -4.0905867 |
| H | -3.6224077 | 0.9271062  | -4.8059426 |
| H | -0.2832589 | 6.4591221  | -0.3785030 |
| H | 0.1997045  | 6.3797099  | 1.3476238  |
| H | -1.5386886 | 6.5125071  | 0.9123374  |

|   |            |            |            |
|---|------------|------------|------------|
| O | 1.7745354  | 1.7268450  | -4.4536016 |
| O | 2.7761327  | 3.5117924  | -2.8437471 |
| O | -0.0237729 | -3.4412607 | 4.6008004  |
| H | -1.6596060 | -4.4216491 | -1.4845938 |
| H | -2.2599670 | -0.3415166 | 1.7874855  |
| H | -2.7307294 | 0.1711258  | -0.3317640 |
| H | -1.2357971 | 2.0240974  | -0.6341972 |
| H | -1.2353706 | 1.9181235  | 1.5210962  |
| P | 3.1488068  | 2.0932996  | -3.6118638 |
| P | -0.1250896 | -4.7874349 | 3.6657236  |
| O | 0.9363556  | -4.9139312 | 2.5971467  |
| O | 3.6407910  | 1.0184880  | -2.6863738 |
| C | -0.1517182 | -6.0756003 | 4.9074861  |
| C | 4.2432842  | 2.6193599  | -4.9283002 |
| C | -1.0756287 | -6.0465577 | 5.9742090  |
| C | 0.7853628  | -7.1222072 | 4.7927624  |
| C | 3.8638624  | 3.5959038  | -5.8738588 |
| C | 5.5136215  | 2.0106609  | -4.9922787 |
| C | -1.0548032 | -7.0751431 | 6.9266089  |
| C | 0.7968832  | -8.1460501 | 5.7526338  |
| C | -0.1208818 | -8.1220575 | 6.8164369  |
| C | 6.4082627  | 2.3797720  | -6.0086710 |
| C | 4.7665764  | 3.9588439  | -6.8842307 |
| C | 6.0349603  | 3.3523555  | -6.9522657 |
| H | -1.8031461 | -5.2262377 | 6.0611195  |
| H | 1.4988965  | -7.1262056 | 3.9555861  |
| H | 2.8715150  | 4.0674116  | -5.8231774 |
| H | 5.7883895  | 1.2515252  | -4.2455870 |
| H | -1.7707438 | -7.0599513 | 7.7618463  |
| H | 1.5269445  | -8.9649017 | 5.6692122  |
| H | -0.1092147 | -8.9259562 | 7.5679844  |
| H | 7.3998797  | 1.9066609  | -6.0632353 |
| H | 4.4787147  | 4.7193893  | -7.6252215 |
| H | 6.7375707  | 3.6415243  | -7.7482764 |
| C | 1.3003750  | -1.9118975 | 0.4403277  |
| N | 0.0026381  | -1.5388778 | 0.6618690  |
| N | 2.0891096  | -0.9194363 | -0.0466278 |
| C | -0.0735153 | -0.2500840 | 0.3045372  |
| C | 1.2646727  | 0.2655840  | -0.2082975 |
| O | -1.1090480 | 0.4831807  | 0.3891934  |
| C | 3.5149232  | -1.0029680 | -0.3393312 |
| N | 1.7545275  | -3.1466721 | 0.6682772  |
| H | 1.2376596  | -3.7864762 | 1.3067262  |
| H | 2.7548559  | -3.3274109 | 0.5762960  |
| H | 1.6297976  | 1.1199108  | 0.3992468  |
| H | 1.2038854  | 0.6004662  | -1.2643906 |

|    |            |            |            |
|----|------------|------------|------------|
| H  | 3.8801465  | 0.0378893  | -0.4188392 |
| C  | 3.8263691  | -1.7330324 | -1.6513765 |
| C  | 5.2782271  | -1.5453242 | -2.1054501 |
| C  | 5.4626592  | -1.7937498 | -3.6067061 |
| C  | 6.8875759  | -1.5360037 | -4.1094260 |
| C  | 7.0259217  | -1.6530285 | -5.6300422 |
| H  | 4.0338915  | -1.4706715 | 0.5277800  |
| H  | 3.1608243  | -1.2954818 | -2.4175151 |
| H  | 3.5705136  | -2.8117815 | -1.5734926 |
| H  | 5.5769508  | -0.4970256 | -1.8905182 |
| H  | 5.9628914  | -2.1974692 | -1.5181538 |
| H  | 4.7590779  | -1.1247428 | -4.1519290 |
| H  | 5.1582630  | -2.8335186 | -3.8643057 |
| H  | 7.2061780  | -0.5195671 | -3.7836140 |
| H  | 7.5907551  | -2.2385598 | -3.6090535 |
| H  | 6.3686894  | -0.9222157 | -6.1474073 |
| H  | 6.7363898  | -2.6647264 | -5.9843841 |
| H  | 8.0660477  | -1.4636760 | -5.9650321 |
| H  | -3.6398508 | 2.7434695  | 0.3725260  |
| C  | -4.5326241 | 2.6762185  | 1.0116360  |
| Cl | -4.5207826 | 4.0827048  | 2.1221018  |
| H  | -4.5541514 | 1.7620238  | 1.6252491  |
| Cl | -5.9699958 | 2.6399604  | -0.0587134 |



### 3io

Energy = -4627.480826822

|   |            |            |            |
|---|------------|------------|------------|
| C | 0.1859716  | -5.5081944 | -0.7032957 |
| C | 1.4312668  | -5.1506936 | -1.3161284 |
| C | -0.5911622 | -4.3526402 | -0.6102504 |
| C | 1.3942827  | -3.7824525 | -1.5866917 |
| N | 0.1583903  | -3.3255442 | -1.1604699 |
| C | -1.8723794 | -4.0915130 | 0.1656915  |
| C | -2.8115230 | -3.1534383 | -0.5758793 |
| C | 2.4807979  | -2.8362503 | -2.0739376 |
| C | 1.9407877  | -1.9152443 | -3.1572308 |
| C | -3.7063115 | -1.1368825 | -1.1626936 |
| N | 1.2951949  | -0.7131426 | -2.8852123 |
| C | 0.9864211  | -0.0492491 | -4.0655024 |
| C | 1.9791853  | -2.0481307 | -4.5434627 |
| C | 1.3816373  | -0.8788893 | -5.1127067 |
| C | 0.3381993  | 1.3252135  | -4.0918067 |
| H | -0.0947880 | -6.5008792 | -0.3359712 |
| H | 2.2743211  | -5.8205464 | -1.5139570 |
| C | -2.5912424 | -5.4368065 | 0.4254564  |
| C | 3.6528205  | -3.6666300 | -2.6533668 |
| H | 2.4030839  | -2.8948567 | -5.0933970 |
| H | 1.2622450  | -0.6639952 | -6.1796254 |
| C | 1.0175505  | 2.2804510  | -3.0815110 |
| C | 0.5295749  | 1.9477413  | -5.4961317 |
| C | -3.7784084 | 0.3750095  | -1.3168026 |
| C | -3.0045806 | 0.7804349  | -2.5575615 |
| N | -1.6226851 | 0.7032041  | -2.6058550 |
| C | -1.1456528 | 1.2022673  | -3.8065363 |
| C | -3.4263248 | 1.3063370  | -3.7764181 |
| C | -2.2578481 | 1.5703653  | -4.5626365 |
| C | -3.2211409 | 1.1228278  | -0.0830354 |
| C | -5.2582798 | 0.7995910  | -1.4771969 |
| H | -4.4644171 | 1.4906973  | -4.0707148 |
| H | -2.2353612 | 1.9949149  | -5.5712478 |
| N | -2.6395090 | -1.7753500 | -0.5538429 |
| C | -3.9945664 | -3.4000902 | -1.2711640 |
| C | -4.5552303 | -2.1351772 | -1.6413898 |
| H | -4.4235181 | -4.3865684 | -1.4770685 |
| H | -5.4807191 | -1.9743354 | -2.2043433 |
| C | -1.5207978 | -3.4632021 | 1.5422942  |
| C | -2.4988527 | -2.7583066 | 2.2757570  |
| C | -0.2310957 | -3.5881106 | 2.0863048  |
| C | -2.1756229 | -2.1443010 | 3.4954984  |

|   |            |            |            |
|---|------------|------------|------------|
| C | 0.0727196  | -2.9878769 | 3.3142659  |
| C | -0.8780719 | -2.2408285 | 4.0238253  |
| H | -3.5206680 | -2.6767990 | 1.8767632  |
| H | 0.5482345  | -4.1490156 | 1.5541897  |
| H | -2.9456263 | -1.5855399 | 4.0480427  |
| H | -0.6049930 | -1.7609311 | 4.9735463  |
| C | 3.0416956  | -2.0208256 | -0.8797324 |
| C | 3.6237444  | -0.7502358 | -1.0669855 |
| C | 3.0136443  | -2.5611677 | 0.4194282  |
| C | 4.0823007  | -0.0006836 | 0.0276922  |
| C | 3.5181615  | -1.8222891 | 1.4959777  |
| C | 4.0256093  | -0.5257300 | 1.3265868  |
| C | 0.2710595  | 3.3028327  | -2.4640194 |
| C | 2.4082561  | 2.2158336  | -2.8626176 |
| C | 0.9136245  | 4.2214025  | -1.6186306 |
| C | 3.0405096  | 3.1499151  | -2.0272494 |
| C | 2.2982986  | 4.1561875  | -1.3916908 |
| C | -2.5802467 | 2.3629141  | -0.2694278 |
| C | -3.4231332 | 0.6472657  | 1.2277418  |
| H | 3.7038675  | -0.3281479 | -2.0771101 |
| H | 2.5948038  | -3.5607541 | 0.5987569  |
| O | 3.5573050  | -2.4196550 | 2.7614823  |
| H | 4.3771936  | 0.0452401  | 2.1965531  |
| H | -0.8031640 | 3.4046218  | -2.6688497 |
| H | 3.0015000  | 1.4416833  | -3.3706369 |
| H | 4.1272548  | 3.0943116  | -1.8651274 |
| H | 2.7704799  | 4.8881680  | -0.7216160 |
| C | -2.9812181 | 1.4025758  | 2.3282672  |
| C | -2.1315948 | 3.1037929  | 0.8335403  |
| C | -2.3324244 | 2.6344936  | 2.1438949  |
| H | -2.4606951 | 2.7715570  | -1.2783837 |
| H | -3.9366513 | -0.3100014 | 1.3917169  |
| H | -3.1390312 | 1.0247888  | 3.3491316  |
| H | -1.9686318 | 3.2291457  | 2.9936063  |
| H | -3.5317699 | -5.2650848 | 0.9821855  |
| H | -1.9484726 | -6.1039350 | 1.0300682  |
| H | -2.8286680 | -5.9484908 | -0.5275375 |
| H | 4.0934822  | -4.3052971 | -1.8647675 |
| H | 4.4405764  | -2.9896993 | -3.0338466 |
| H | 3.3108268  | -4.3191899 | -3.4795945 |
| H | 0.0891262  | 2.9618921  | -5.5222268 |
| H | 0.0389748  | 1.3325650  | -6.2746426 |
| H | 1.6072992  | 2.0265621  | -5.7319535 |
| H | -5.3273252 | 1.8980566  | -1.5912767 |
| H | -5.8368372 | 0.4964107  | -0.5842460 |
| H | -5.7139414 | 0.3264817  | -2.3680045 |

|    |            |            |            |
|----|------------|------------|------------|
| O  | 1.3454215  | -3.1966804 | 3.8524311  |
| H  | 4.4902329  | 1.0072896  | -0.1341640 |
| H  | -0.2045401 | -2.3901893 | -1.3532459 |
| H  | 1.3071871  | -0.2674837 | -1.9617106 |
| H  | -1.0378608 | 0.4604875  | -1.8029536 |
| H  | -1.9587418 | -1.2958831 | 0.0457800  |
| P  | 2.5062345  | -2.0317066 | 3.9697237  |
| O  | 1.9978066  | -0.6146780 | 3.9477788  |
| C  | 3.4121287  | -2.5493444 | 5.4279332  |
| C  | 3.6000870  | -1.5988865 | 6.4521765  |
| C  | 3.9145060  | -3.8618386 | 5.5619070  |
| C  | 4.2944524  | -1.9646746 | 7.6163019  |
| C  | 4.6064973  | -4.2158824 | 6.7292480  |
| C  | 4.7957265  | -3.2702486 | 7.7544996  |
| H  | 3.2011216  | -0.5808821 | 6.3309921  |
| H  | 3.7652353  | -4.6011022 | 4.7615130  |
| H  | 4.4431004  | -1.2263769 | 8.4182703  |
| H  | 5.0003219  | -5.2371317 | 6.8410128  |
| H  | 5.3383506  | -3.5556407 | 8.6684672  |
| C  | -1.4490337 | 6.9358647  | 0.1636313  |
| C  | -2.4010223 | 7.8478330  | -0.3347269 |
| H  | -3.0516629 | 7.5525947  | -1.1713082 |
| C  | -2.5053789 | 9.1232994  | 0.2428720  |
| H  | -3.2456413 | 9.8393326  | -0.1442751 |
| C  | -1.6654329 | 9.4819995  | 1.3107445  |
| H  | -1.7483102 | 10.4824785 | 1.7618883  |
| C  | -0.7175800 | 8.5671978  | 1.8072014  |
| H  | -0.0619250 | 8.8511438  | 2.6440061  |
| C  | -0.6045074 | 7.2911149  | 1.2374438  |
| H  | 0.1344822  | 6.5740420  | 1.6234883  |
| P  | -1.3651034 | 5.3158222  | -0.6016945 |
| O  | 0.2395583  | 5.2565097  | -0.9775382 |
| O  | -2.3315000 | 5.0430385  | -1.7205256 |
| O  | -1.4582300 | 4.3077397  | 0.7073040  |
| H  | 1.1560788  | 0.3546714  | 2.4253989  |
| C  | 0.4946140  | 0.7508540  | 1.6304845  |
| Cl | 0.2480954  | -0.6192879 | 0.4695095  |
| Cl | 1.2346089  | 2.1492335  | 0.8297198  |
| H  | -0.5064748 | 1.0312163  | 1.9973647  |

## 2bC3io

Energy = -5219.916074711

|   |            |            |            |
|---|------------|------------|------------|
| C | -0.1733994 | -5.7801788 | -1.7649736 |
| C | 1.0666717  | -5.2905087 | -2.2878969 |
| C | -0.7081798 | -4.7865107 | -0.9403563 |
| C | 1.2650883  | -4.0084459 | -1.7708010 |
| N | 0.1757761  | -3.7243314 | -0.9705900 |
| C | -1.9462286 | -4.7691551 | -0.0548876 |
| C | -3.0607425 | -3.9294765 | -0.6528228 |
| C | 2.3926584  | -3.0034280 | -1.9787245 |
| C | 2.0420838  | -2.0469420 | -3.1044310 |
| C | -4.0803298 | -1.9973724 | -1.2837982 |
| N | 0.9873802  | -1.1602223 | -3.0017477 |
| C | 0.8870867  | -0.3856538 | -4.1433768 |
| C | 2.6211320  | -1.8532026 | -4.3586429 |
| C | 1.8937138  | -0.8090720 | -5.0131795 |
| C | -0.0485326 | 0.8094469  | -4.2222018 |
| H | -0.6198958 | -6.7609469 | -1.9595230 |
| H | 1.7387231  | -5.8179952 | -2.9727332 |
| C | -2.4523136 | -6.2179323 | 0.1340028  |
| C | 3.6834436  | -3.7665813 | -2.3638256 |
| H | 3.4668812  | -2.4136244 | -4.7694617 |
| H | 2.0917706  | -0.4045417 | -6.0109370 |
| C | 0.3955494  | 1.8704473  | -3.1799847 |
| C | 0.0932402  | 1.4656054  | -5.6165252 |
| C | -4.1935795 | -0.5213851 | -1.6218195 |
| C | -3.3707139 | -0.1781810 | -2.8556810 |
| N | -2.0059331 | 0.0340326  | -2.7828670 |
| C | -1.5010661 | 0.4149609  | -4.0154716 |
| C | -3.7524167 | 0.0541349  | -4.1765575 |
| C | -2.5786395 | 0.4277076  | -4.9053985 |
| C | -3.7388453 | 0.3897149  | -0.4522870 |
| C | -5.6811685 | -0.1993296 | -1.9051263 |
| H | -4.7700170 | -0.0187429 | -4.5737634 |
| H | -2.5323131 | 0.7012765  | -5.9642685 |
| N | -2.8815510 | -2.5879367 | -0.9303921 |
| C | -4.4104589 | -4.2155035 | -0.8600574 |
| C | -5.0521939 | -2.9997381 | -1.2583268 |
| H | -4.8877869 | -5.1932756 | -0.7366641 |
| H | -6.1104004 | -2.8774346 | -1.5112460 |
| C | -1.5826550 | -4.2043075 | 1.3423719  |
| C | -2.5129166 | -3.4586517 | 2.0932900  |
| C | -0.3216634 | -4.4698069 | 1.9049236  |
| C | -2.1798871 | -2.9651244 | 3.3642506  |

|   |            |            |            |
|---|------------|------------|------------|
| C | -0.0065608 | -3.9755290 | 3.1742495  |
| C | -0.9166255 | -3.2139068 | 3.9206132  |
| H | -3.5129377 | -3.2737417 | 1.6748089  |
| H | 0.4265278  | -5.0595718 | 1.3582496  |
| H | -2.9164746 | -2.3775590 | 3.9332830  |
| H | -0.6337278 | -2.8287514 | 4.9089613  |
| C | 2.6803656  | -2.2426900 | -0.6589342 |
| C | 2.9091299  | -0.8524008 | -0.6163052 |
| C | 2.7993259  | -2.9760562 | 0.5385169  |
| C | 3.2341052  | -0.2122342 | 0.5925424  |
| C | 3.1498969  | -2.3300621 | 1.7290572  |
| C | 3.3624325  | -0.9443714 | 1.7817831  |
| C | -0.5438409 | 2.7305829  | -2.5793569 |
| C | 1.7652909  | 2.0265753  | -2.8786981 |
| C | -0.1059190 | 3.7126051  | -1.6745779 |
| C | 2.1919898  | 3.0437715  | -2.0105793 |
| C | 1.2590079  | 3.8980141  | -1.4031969 |
| C | -3.6384710 | 1.7787266  | -0.6872907 |
| C | -3.4773836 | -0.0986604 | 0.8407837  |
| H | 2.8336070  | -0.2609026 | -1.5377318 |
| H | 2.6413923  | -4.0636143 | 0.5475376  |
| O | 3.3877248  | -3.1170428 | 2.8625037  |
| H | 3.6265349  | -0.4656577 | 2.7343528  |
| H | -1.6116992 | 2.6339344  | -2.8085417 |
| H | 2.4976341  | 1.3526633  | -3.3471029 |
| H | 3.2641064  | 3.1689893  | -1.7963238 |
| H | 1.5646098  | 4.6923839  | -0.7089643 |
| C | -3.1231104 | 0.7788589  | 1.8809581  |
| C | -3.2922999 | 2.6444840  | 0.3609031  |
| C | -3.0327535 | 2.1586707  | 1.6546210  |
| H | -3.8388593 | 2.1918547  | -1.6859771 |
| H | -3.5349436 | -1.1749244 | 1.0394802  |
| H | -2.9025490 | 0.3755123  | 2.8801905  |
| H | -2.7611709 | 2.8623475  | 2.4535851  |
| H | -3.3216816 | -6.2334329 | 0.8179644  |
| H | -1.6526138 | -6.8478002 | 0.5675421  |
| H | -2.7623364 | -6.6521876 | -0.8363846 |
| H | 3.9534378  | -4.4880238 | -1.5704851 |
| H | 4.5206648  | -3.0557023 | -2.5003883 |
| H | 3.5411211  | -4.3241006 | -3.3095344 |
| H | -0.5755104 | 2.3432181  | -5.6919126 |
| H | -0.1678418 | 0.7451404  | -6.4154085 |
| H | 1.1340300  | 1.8038859  | -5.7756682 |
| H | -5.8017429 | 0.8647006  | -2.1806261 |
| H | -6.2918479 | -0.4050164 | -1.0057930 |
| H | -6.0636461 | -0.8205085 | -2.7374397 |

|    |            |            |            |
|----|------------|------------|------------|
| O  | 1.2438480  | -4.3256266 | 3.7036528  |
| H  | 3.4024086  | 0.8750565  | 0.6037947  |
| H  | 0.0276868  | -2.8166277 | -0.4967355 |
| H  | 0.4222189  | -1.0494092 | -2.1435986 |
| H  | -1.4465751 | -0.1382613 | -1.9307491 |
| H  | -2.0023433 | -2.0692662 | -0.7692506 |
| P  | 2.3969624  | -3.2535976 | 4.1646215  |
| O  | 1.8731538  | -1.9531330 | 4.7273501  |
| C  | 3.4111045  | -4.2305285 | 5.2703442  |
| C  | 3.6074096  | -3.7559344 | 6.5831430  |
| C  | 3.9931291  | -5.4451343 | 4.8477467  |
| H  | -1.0085923 | -3.3068262 | -3.0550013 |
| C  | -1.4448357 | -3.0953492 | -4.0443216 |
| Cl | -3.0423750 | -3.9016342 | -4.1250800 |
| Cl | -0.2984619 | -3.6915526 | -5.2874595 |
| C  | 4.3905826  | -4.5025640 | 7.4773858  |
| C  | 4.7731673  | -6.1826232 | 5.7496994  |
| C  | 4.9717026  | -5.7125995 | 7.0614008  |
| H  | 3.1467287  | -2.8069559 | 6.8947220  |
| H  | 3.8385234  | -5.8103564 | 3.8219966  |
| H  | 4.5471669  | -4.1368996 | 8.5030958  |
| H  | 5.2298584  | -7.1301156 | 5.4272504  |
| H  | 5.5854404  | -6.2961316 | 7.7642318  |
| H  | -1.5978199 | -2.0174630 | -4.2203093 |
| C  | 0.3257599  | 0.3115512  | 2.3863331  |
| N  | 0.0636899  | -0.8057652 | 1.6388212  |
| N  | 0.2021888  | 1.4781002  | 1.6954456  |
| C  | -0.2105779 | -0.3631547 | 0.4076224  |
| C  | -0.0930674 | 1.1449150  | 0.3178654  |
| O  | -0.5256930 | -1.0726402 | -0.5995846 |
| C  | 0.4479490  | 2.8339594  | 2.1563022  |
| N  | 0.6465036  | 0.2482364  | 3.6776867  |
| H  | 0.9690153  | -0.6654177 | 4.0679814  |
| H  | 0.9355315  | 1.0938863  | 4.1697728  |
| H  | -1.0315876 | 1.6105788  | -0.0419015 |
| H  | 0.7277405  | 1.4300900  | -0.3740402 |
| H  | -0.2120357 | 3.4981727  | 1.5605155  |
| C  | 1.9079022  | 3.2778285  | 2.0048906  |
| C  | 2.0894552  | 4.7785298  | 2.2478197  |
| C  | 3.5174206  | 5.2691559  | 1.9895816  |
| C  | 3.6961756  | 6.7781637  | 2.1984860  |
| C  | 5.1223185  | 7.2649907  | 1.9258125  |
| H  | 0.1061209  | 2.9255869  | 3.2092099  |
| H  | 2.2404945  | 3.0260647  | 0.9759447  |
| H  | 2.5530117  | 2.6917324  | 2.6944432  |
| H  | 1.3837308  | 5.3391424  | 1.5920521  |

|   |            |            |            |
|---|------------|------------|------------|
| H | 1.7888257  | 5.0295677  | 3.2893361  |
| H | 3.8117379  | 5.0049784  | 0.9479430  |
| H | 4.2229856  | 4.7152836  | 2.6491710  |
| H | 2.9819866  | 7.3222456  | 1.5403881  |
| H | 3.4027528  | 7.0384439  | 3.2398825  |
| H | 5.4268025  | 7.0480584  | 0.8802587  |
| H | 5.8535666  | 6.7625440  | 2.5935856  |
| H | 5.2201813  | 8.3584847  | 2.0837244  |
| C | -2.7456677 | 6.4974966  | -0.6533122 |
| C | -3.3039575 | 7.3982866  | -1.5827153 |
| H | -3.6530346 | 7.0278336  | -2.5577953 |
| C | -3.4072335 | 8.7583843  | -1.2500372 |
| H | -3.8427825 | 9.4655982  | -1.9714309 |
| C | -2.9555484 | 9.2126437  | 0.0008098  |
| H | -3.0367992 | 10.2794688 | 0.2584417  |
| C | -2.4006075 | 8.3095838  | 0.9273109  |
| H | -2.0503102 | 8.6685564  | 1.9064545  |
| C | -2.2933017 | 6.9493795  | 0.6056994  |
| H | -1.8641689 | 6.2414180  | 1.3295134  |
| P | -2.5923078 | 4.7796801  | -1.1413629 |
| O | -0.9695065 | 4.5108351  | -0.9354897 |
| O | -3.1567091 | 4.3882974  | -2.4780076 |
| O | -3.2227989 | 4.0284995  | 0.1858838  |

300

Energy = -4627.480850672

|   |            |            |            |
|---|------------|------------|------------|
| C | 2.5053725  | -0.8885340 | 3.0976936  |
| C | 3.7945757  | -0.7587526 | 3.6131701  |
| H | 4.3088376  | -1.4931209 | 4.2425952  |
| C | 4.3206513  | 0.4983369  | 3.1699680  |
| H | 5.3012397  | 0.9178516  | 3.4187333  |
| C | 3.3455154  | 1.1138363  | 2.3880553  |
| C | 3.2448647  | 2.5166436  | 1.8088162  |
| C | 1.7979654  | 3.0126693  | 2.0809018  |
| C | 1.2939052  | 3.0200546  | 3.4000630  |
| H | 1.9374303  | 2.6980163  | 4.2325630  |
| C | -0.0313643 | 3.4060109  | 3.6504682  |
| H | -0.4162845 | 3.4059900  | 4.6814295  |
| C | -0.8786215 | 3.7870134  | 2.5959564  |
| H | -1.9230686 | 4.0816989  | 2.7689164  |
| C | -0.3701124 | 3.7798093  | 1.2898362  |
| C | 0.9560853  | 3.4018518  | 1.0277659  |
| H | 1.3264774  | 3.4050343  | -0.0012780 |
| C | -2.1951486 | 6.1773645  | -1.1924816 |
| C | -1.8232026 | 7.5244188  | -1.3742553 |
| H | -0.7592567 | 7.7860317  | -1.4726389 |
| C | -2.8170085 | 8.5147801  | -1.4300834 |
| H | -2.5321134 | 9.5675711  | -1.5745264 |
| C | -4.1708712 | 8.1598878  | -1.3036429 |
| H | -4.9484558 | 8.9376155  | -1.3488854 |
| C | -4.5380871 | 6.8133207  | -1.1191523 |
| H | -5.5990711 | 6.5396423  | -1.0194876 |
| C | -3.5538093 | 5.8166275  | -1.0617667 |
| H | -3.8365353 | 4.7637901  | -0.9166667 |
| C | 4.2453680  | 3.4499070  | 2.5299611  |
| H | 4.1227122  | 4.4905899  | 2.1751555  |
| H | 5.2869451  | 3.1336520  | 2.3284634  |
| H | 4.0767238  | 3.4335598  | 3.6227290  |
| C | 3.5332071  | 2.5465630  | 0.3186927  |
| C | 4.0761373  | 3.5565021  | -0.4759453 |
| H | 4.5161447  | 4.4909134  | -0.1126877 |
| C | 3.9085693  | 3.1733223  | -1.8459178 |
| H | 4.2052008  | 3.7552487  | -2.7247994 |
| C | 3.2637950  | 1.9364302  | -1.8644061 |
| C | 2.6961765  | 1.1228706  | -3.0135902 |
| C | 1.1631865  | 1.3540414  | -3.1191490 |
| C | 0.5906719  | 2.5413705  | -2.6220454 |
| H | 1.2299987  | 3.3183029  | -2.1803808 |



|   |            |            |            |
|---|------------|------------|------------|
| C | -0.7969224 | 2.7392331  | -2.7058926 |
| C | -1.6362671 | 1.7735917  | -3.2850970 |
| H | -2.7202464 | 1.9492028  | -3.3151257 |
| C | -1.0582843 | 0.6131980  | -3.8179789 |
| H | -1.6989657 | -0.1451159 | -4.2909081 |
| C | 0.3295030  | 0.4064447  | -3.7478762 |
| H | 0.7601579  | -0.5080489 | -4.1778231 |
| C | 3.3318183  | 1.5982085  | -4.3430117 |
| H | 2.9434835  | 0.9945217  | -5.1850142 |
| H | 4.4343978  | 1.5036132  | -4.3121012 |
| H | 3.0777392  | 2.6588428  | -4.5299232 |
| C | 3.0035655  | -0.3536996 | -2.8070320 |
| C | 4.0755336  | -1.1334272 | -3.2383242 |
| H | 4.9352143  | -0.7759370 | -3.8149675 |
| C | 3.8407132  | -2.4802926 | -2.8061955 |
| H | 4.4821659  | -3.3468290 | -2.9997735 |
| C | 2.6303970  | -2.4989195 | -2.1152477 |
| C | 1.8050557  | -3.6428734 | -1.5450282 |
| C | 0.3192662  | -3.3932647 | -1.9160578 |
| C | -0.0475954 | -3.1661850 | -3.2600656 |
| H | 0.7262324  | -3.1584475 | -4.0426197 |
| C | -1.3886786 | -2.9371998 | -3.6023836 |
| H | -1.6630653 | -2.7679712 | -4.6544303 |
| C | -2.3898725 | -2.9155083 | -2.6150375 |
| H | -3.4430452 | -2.7210291 | -2.8615628 |
| C | -2.0162459 | -3.1356573 | -1.2820042 |
| C | -0.6800124 | -3.3817593 | -0.9298037 |
| H | -0.4265464 | -3.5723849 | 0.1169818  |
| C | 2.2555357  | -4.9753817 | -2.1866229 |
| H | 1.6134588  | -5.8046687 | -1.8344083 |
| H | 3.3040877  | -5.2041677 | -1.9154332 |
| H | 2.1814478  | -4.9189865 | -3.2884137 |
| C | -4.8711091 | -4.5907366 | 0.9009068  |
| C | -5.0820363 | -5.9847309 | 0.8892282  |
| H | -4.2226173 | -6.6655054 | 0.9789074  |
| C | -6.3877210 | -6.4846821 | 0.7641769  |
| H | -6.5581746 | -7.5716211 | 0.7561126  |
| C | -7.4717923 | -5.5973766 | 0.6519230  |
| H | -8.4947266 | -5.9914154 | 0.5544672  |
| C | -7.2567319 | -4.2061310 | 0.6639243  |
| H | -8.1086347 | -3.5153567 | 0.5773613  |
| C | -5.9568830 | -3.6955817 | 0.7868428  |
| H | -5.7859423 | -2.6091619 | 0.7953748  |
| C | 1.9611770  | -3.7459358 | -0.0387871 |
| C | 2.1617240  | -4.8499651 | 0.7900549  |
| H | 2.3484409  | -5.8758800 | 0.4570316  |

|    |            |            |            |
|----|------------|------------|------------|
| C  | 2.0519564  | -4.4039927 | 2.1480412  |
| H  | 2.1533864  | -5.0205396 | 3.0471131  |
| C  | 1.7829079  | -3.0365089 | 2.1215155  |
| C  | 1.5067529  | -2.0309735 | 3.2243227  |
| C  | 0.0383307  | -1.5420813 | 3.1389778  |
| C  | -0.9508695 | -2.4227884 | 2.6526125  |
| H  | -0.6760078 | -3.4390619 | 2.3357260  |
| C  | -2.2960425 | -2.0189226 | 2.6192569  |
| C  | -2.6822184 | -0.7354459 | 3.0387943  |
| H  | -3.7372467 | -0.4369364 | 2.9711722  |
| C  | -1.7001027 | 0.1289124  | 3.5407988  |
| H  | -1.9833177 | 1.1367292  | 3.8764357  |
| C  | -0.3565993 | -0.2745548 | 3.6126211  |
| H  | 0.3847832  | 0.4165602  | 4.0358966  |
| C  | 1.6834215  | -2.7145527 | 4.6018548  |
| H  | 0.9599852  | -3.5447945 | 4.7106811  |
| H  | 1.5036653  | -1.9828381 | 5.4115486  |
| H  | 2.7051607  | -3.1254939 | 4.7133821  |
| P  | -0.8903883 | 4.9475745  | -1.1142180 |
| P  | -3.1812056 | -4.0075409 | 1.0190032  |
| O  | -1.2468802 | 4.1164510  | 0.2691615  |
| O  | 0.5214086  | 5.4469761  | -1.2364946 |
| O  | -1.4231563 | 3.9002116  | -2.2691559 |
| O  | -3.0033093 | -3.0170014 | -0.3078950 |
| O  | -2.1178416 | -5.0546889 | 1.1851830  |
| O  | -3.3222766 | -2.8683499 | 2.2006448  |
| N  | 2.2721063  | 0.2338099  | 2.3177098  |
| H  | 1.3384132  | 0.5113969  | 1.9992670  |
| N  | 3.0529882  | 1.5763834  | -0.5442870 |
| H  | 2.6931389  | 0.6682940  | -0.2456756 |
| N  | 2.1638233  | -1.1927038 | -2.0875664 |
| H  | 1.2070178  | -0.9332775 | -1.8274524 |
| N  | 1.7520054  | -2.6584921 | 0.7919232  |
| H  | 1.5065643  | -1.7201795 | 0.4721218  |
| H  | -2.0719925 | -0.9070316 | 0.3399188  |
| C  | -1.8175733 | -0.0578601 | -0.3120543 |
| Cl | -0.0613962 | 0.3044357  | -0.0543553 |
| Cl | -2.8470190 | 1.3221852  | 0.1020125  |
| H  | -1.9261180 | -0.2870642 | -1.3850314 |

## 2bC300

Energy = -5219.910896521

|   |            |            |            |
|---|------------|------------|------------|
| C | 3.0856544  | -1.4015906 | 2.7580400  |
| C | 4.2321229  | -1.0812016 | 3.4894522  |
| H | 4.7400464  | -1.7347798 | 4.2062852  |
| C | 4.6049320  | 0.2595370  | 3.1463191  |
| H | 5.4474509  | 0.8250505  | 3.5574413  |
| C | 3.6794159  | 0.7312859  | 2.2108978  |
| C | 3.5027414  | 2.1079196  | 1.5864865  |
| C | 2.0511193  | 2.6059065  | 1.8233906  |
| C | 1.3931322  | 2.3109779  | 3.0348603  |
| H | 1.8938273  | 1.6746624  | 3.7785505  |
| C | 0.1230780  | 2.8435719  | 3.3056214  |
| H | -0.3732696 | 2.6209124  | 4.2621869  |
| C | -0.5221660 | 3.6606087  | 2.3653158  |
| H | -1.5152256 | 4.0899390  | 2.5547674  |
| C | 0.1287348  | 3.9423547  | 1.1542051  |
| C | 1.4126366  | 3.4388238  | 0.8813385  |
| H | 1.9302715  | 3.7130581  | -0.0486756 |
| C | -1.6751232 | 6.0256929  | -1.7640030 |
| C | -1.3138296 | 7.1496065  | -2.5334506 |
| H | -0.2720322 | 7.2688540  | -2.8654531 |
| C | -2.2891334 | 8.1044047  | -2.8634996 |
| H | -2.0105239 | 8.9841372  | -3.4622392 |
| C | -3.6143825 | 7.9358859  | -2.4279641 |
| H | -4.3765725 | 8.6860834  | -2.6873205 |
| C | -3.9727557 | 6.8106498  | -1.6613416 |
| H | -5.0119125 | 6.6812451  | -1.3238632 |
| C | -3.0062898 | 5.8522816  | -1.3268213 |
| H | -3.2853513 | 4.9723336  | -0.7292972 |
| C | 4.4412914  | 3.1066154  | 2.3059038  |
| H | 4.2930138  | 4.1267315  | 1.9049875  |
| H | 5.4998196  | 2.8190341  | 2.1560880  |
| H | 4.2241959  | 3.1227490  | 3.3904143  |
| C | 3.8307855  | 2.1113162  | 0.1054634  |
| C | 4.6586907  | 2.9505269  | -0.6420637 |
| H | 5.3125378  | 3.7323733  | -0.2419204 |
| C | 4.5000566  | 2.6007870  | -2.0219544 |
| H | 5.0068762  | 3.0639115  | -2.8749416 |
| C | 3.5812570  | 1.5553188  | -2.0847058 |
| C | 2.9601956  | 0.8203551  | -3.2601331 |
| C | 1.4201624  | 0.9835376  | -3.2054969 |
| C | 0.8917192  | 2.1449135  | -2.6071850 |
| H | 1.5686613  | 2.9066390  | -2.2029064 |

|   |            |            |            |
|---|------------|------------|------------|
| C | -0.4945875 | 2.3263887  | -2.5267390 |
| C | -1.3850389 | 1.3779444  | -3.0576957 |
| H | -2.4686199 | 1.5366164  | -2.9682878 |
| C | -0.8546755 | 0.2346214  | -3.6733317 |
| H | -1.5348266 | -0.5312114 | -4.0737269 |
| C | 0.5338632  | 0.0376556  | -3.7567691 |
| H | 0.9197184  | -0.8764837 | -4.2263255 |
| C | 3.4515741  | 1.4583827  | -4.5810401 |
| H | 3.0090288  | 0.9281582  | -5.4456636 |
| H | 4.5544488  | 1.4038695  | -4.6597908 |
| H | 3.1521003  | 2.5230403  | -4.6246811 |
| C | 3.3759971  | -0.6427084 | -3.2258464 |
| C | 4.4648920  | -1.2962818 | -3.8072796 |
| H | 5.2361095  | -0.8278310 | -4.4274956 |
| C | 4.3923820  | -2.6778560 | -3.4368108 |
| H | 5.0825127  | -3.4715475 | -3.7400449 |
| C | 3.2637634  | -2.8416847 | -2.6324276 |
| C | 2.5684072  | -4.0850006 | -2.0973800 |
| C | 1.0834130  | -3.9898924 | -2.5367043 |
| C | 0.7750366  | -3.6828620 | -3.8806311 |
| H | 1.5918050  | -3.5207009 | -4.6002495 |
| C | -0.5580341 | -3.5520065 | -4.2913141 |
| H | -0.7900104 | -3.3122023 | -5.3401310 |
| C | -1.6071949 | -3.7045453 | -3.3681877 |
| H | -2.6583194 | -3.5795167 | -3.6650888 |
| C | -1.2900394 | -3.9991824 | -2.0374038 |
| C | 0.0386640  | -4.1641540 | -1.6192493 |
| H | 0.2641265  | -4.4002891 | -0.5751973 |
| C | 3.1951373  | -5.3385584 | -2.7485724 |
| H | 2.6622537  | -6.2490516 | -2.4148564 |
| H | 4.2609204  | -5.4291748 | -2.4630961 |
| H | 3.1267682  | -5.2781640 | -3.8507045 |
| C | -4.1068807 | -5.3409419 | 0.4118635  |
| C | -4.3039739 | -6.7341013 | 0.4950935  |
| H | -3.4336418 | -7.4052149 | 0.5431330  |
| C | -5.6103045 | -7.2480498 | 0.5204952  |
| H | -5.7680910 | -8.3348196 | 0.5876806  |
| C | -6.7109377 | -6.3761638 | 0.4643469  |
| H | -7.7337728 | -6.7817254 | 0.4846187  |
| C | -6.5109113 | -4.9849958 | 0.3872828  |
| H | -7.3743296 | -4.3041234 | 0.3502701  |
| C | -5.2104946 | -4.4619008 | 0.3634001  |
| H | -5.0521155 | -3.3746727 | 0.3184340  |
| C | 2.7045632  | -4.2054051 | -0.5886063 |
| C | 3.1247016  | -5.2791904 | 0.1975269  |
| H | 3.4738912  | -6.2485117 | -0.1724078 |

|   |            |            |            |
|---|------------|------------|------------|
| C | 3.0379067  | -4.8764581 | 1.5674279  |
| H | 3.3021112  | -5.4812417 | 2.4409576  |
| C | 2.5654417  | -3.5640658 | 1.5902487  |
| C | 2.2154013  | -2.6543199 | 2.7568277  |
| C | 0.7167703  | -2.2607793 | 2.7151285  |
| C | -0.2135118 | -3.0747862 | 2.0409998  |
| H | 0.1198702  | -3.9947295 | 1.5439719  |
| C | -1.5688021 | -2.7100925 | 2.0154659  |
| C | -2.0287185 | -1.5627291 | 2.6809974  |
| H | -3.0960588 | -1.3061560 | 2.6394587  |
| C | -1.1050108 | -0.7789366 | 3.3878533  |
| H | -1.4528218 | 0.1152740  | 3.9260934  |
| C | 0.2557403  | -1.1206553 | 3.4052490  |
| H | 0.9697454  | -0.4909602 | 3.9522911  |
| C | 2.4494397  | -3.4250437 | 4.0789428  |
| H | 1.8022537  | -4.3215519 | 4.1145889  |
| H | 2.2099211  | -2.7784237 | 4.9439077  |
| H | 3.5039197  | -3.7514399 | 4.1627861  |
| P | -0.3930687 | 4.8337778  | -1.3717602 |
| P | -2.4144188 | -4.7434278 | 0.3565055  |
| O | -0.5751757 | 4.7542860  | 0.2670173  |
| O | 0.9878186  | 5.1185043  | -1.8890559 |
| O | -1.0753092 | 3.3984084  | -1.8468105 |
| O | -2.3717933 | -4.0479729 | -1.1528221 |
| O | -1.3262587 | -5.7366522 | 0.6444170  |
| O | -2.5472627 | -3.4426130 | 1.3542097  |
| N | 2.7822918  | -0.2962670 | 1.9869074  |
| H | 2.0111531  | -0.2782143 | 1.2998322  |
| N | 3.1982296  | 1.2666822  | -0.7884393 |
| H | 2.4500301  | 0.5943899  | -0.5524333 |
| N | 2.6813285  | -1.5934119 | -2.5018011 |
| H | 1.8332659  | -1.3944299 | -1.9547371 |
| N | 2.3804266  | -3.1743079 | 0.2758638  |
| H | 1.9194473  | -2.2883071 | 0.0043500  |
| N | -1.0319955 | -1.3063878 | -0.7046351 |
| N | -3.3638421 | -1.2290285 | -0.9708966 |
| N | -2.1298982 | 0.5574766  | 0.0258126  |
| C | -2.2251678 | -0.6679555 | -0.5517361 |
| C | -3.1475214 | 1.5839107  | 0.1871980  |
| C | -3.5236115 | 1.8516560  | 1.6487415  |
| H | -4.0368574 | 1.3037109  | -0.4127560 |
| O | 1.1526531  | -0.6796373 | -0.2379773 |
| C | -0.0972183 | -0.4735229 | -0.2309014 |
| C | -0.7287619 | 0.7865098  | 0.3363718  |
| H | -3.3042682 | -2.2023003 | -1.2898319 |
| H | -4.2746544 | -0.7974561 | -0.8246933 |

|    |            |            |            |
|----|------------|------------|------------|
| H  | -0.3329145 | 1.6982101  | -0.1457058 |
| H  | -0.5411665 | 0.8632803  | 1.4288884  |
| H  | -2.5938150 | 1.8659131  | 2.2543491  |
| H  | -4.1398388 | 1.0155743  | 2.0420858  |
| C  | -4.2518692 | 3.1880244  | 1.8129803  |
| H  | -5.1876689 | 3.1850858  | 1.2112961  |
| H  | -3.6173211 | 3.9932980  | 1.3758663  |
| C  | -4.5752721 | 3.5427629  | 3.2672870  |
| H  | -3.6368417 | 3.5202519  | 3.8668552  |
| H  | -5.2281166 | 2.7544762  | 3.7052194  |
| C  | -5.2448040 | 4.9131203  | 3.4272543  |
| H  | -6.1811357 | 4.9322733  | 2.8266830  |
| H  | -4.5864152 | 5.6921653  | 2.9811832  |
| C  | -5.5556138 | 5.2726723  | 4.8830265  |
| H  | -2.7444729 | 2.5113076  | -0.2733659 |
| H  | -4.6308473 | 5.2945827  | 5.4970772  |
| H  | -6.2404162 | 4.5298484  | 5.3439546  |
| H  | -6.0370558 | 6.2682819  | 4.9653698  |
| H  | 4.9382397  | -1.0512399 | 0.9127092  |
| C  | 5.2156032  | -1.3878695 | -0.0985546 |
| Cl | 5.8932040  | -3.0414144 | 0.0416415  |
| Cl | 6.3853433  | -0.2051463 | -0.7651770 |
| H  | 4.3548997  | -1.4347594 | -0.7832480 |

4

Energy = -3409.895249548

|   |            |            |            |
|---|------------|------------|------------|
| C | 0.0591764  | -4.6208516 | -0.2928687 |
| C | 1.2163167  | -4.3309843 | -1.0883712 |
| C | -0.2327788 | -3.4869751 | 0.4647430  |
| C | 1.6103140  | -3.0250534 | -0.8017703 |
| N | 0.6959222  | -2.5211294 | 0.1108769  |
| C | -1.3012875 | -3.2309719 | 1.5171924  |
| C | -2.4768665 | -2.4892170 | 0.9081717  |
| C | 2.8132542  | -2.2089914 | -1.2490968 |
| C | 2.4521325  | -1.2896589 | -2.4036862 |
| C | -3.5535115 | -0.7043881 | -0.0130707 |
| N | 1.3534321  | -0.4485889 | -2.3634525 |
| C | 1.3280717  | 0.3924061  | -3.4619017 |
| C | 3.1418092  | -0.9907252 | -3.5797287 |
| C | 2.4359188  | 0.0643488  | -4.2443301 |
| C | 0.3589618  | 1.5594919  | -3.5537495 |
| H | -0.4938440 | -5.5659354 | -0.2704398 |
| H | 1.7167734  | -5.0137814 | -1.7834492 |
| C | -1.7946767 | -4.5844026 | 2.0812158  |
| C | 3.9411015  | -3.1646981 | -1.7069415 |
| H | 4.0681029  | -1.4665835 | -3.9174268 |
| H | 2.7258561  | 0.5529064  | -5.1803748 |
| C | 0.7968694  | 2.6794875  | -2.5697778 |
| C | 0.3966638  | 2.1375602  | -4.9891033 |
| C | -3.6681623 | 0.6930748  | -0.5930561 |
| C | -2.8779003 | 0.7498319  | -1.8959519 |
| N | -1.5414643 | 1.1136892  | -1.9258854 |
| C | -1.0573661 | 1.1114982  | -3.2260095 |
| C | -3.2403562 | 0.4383461  | -3.2057740 |
| C | -2.0972074 | 0.6659882  | -4.0411047 |
| C | -3.1277006 | 1.7497345  | 0.4006981  |
| C | -5.1561372 | 1.0067529  | -0.8759044 |
| H | -4.2249289 | 0.0852874  | -3.5317361 |
| H | -2.0455310 | 0.5267537  | -5.1264627 |
| N | -2.3297359 | -1.2252109 | 0.3674576  |
| C | -3.8334743 | -2.8054797 | 0.8347207  |
| C | -4.5107864 | -1.6823437 | 0.2542184  |
| H | -4.2936424 | -3.7408301 | 1.1696189  |
| H | -5.5843794 | -1.6013831 | 0.0553761  |
| C | -0.7139869 | -2.4205892 | 2.7010549  |
| C | -1.5086735 | -1.5012850 | 3.4114104  |
| C | 0.6017640  | -2.6765912 | 3.1386314  |
| C | -0.9832812 | -0.8300544 | 4.5287981  |

|   |            |            |            |
|---|------------|------------|------------|
| C | 1.1210197  | -2.0116846 | 4.2653187  |
| C | 0.3294170  | -1.0695573 | 4.9542792  |
| H | -2.5478503 | -1.3296040 | 3.1000467  |
| H | 1.1956865  | -3.4251041 | 2.5990385  |
| H | -1.6080032 | -0.1104486 | 5.0793741  |
| H | 0.7588667  | -0.5525632 | 5.8241719  |
| C | 3.3345332  | -1.3899211 | -0.0364369 |
| C | 3.6468111  | -0.0237571 | -0.1409311 |
| C | 3.5193834  | -2.0397347 | 1.2025562  |
| C | 4.0980015  | 0.6939511  | 0.9784362  |
| C | 3.9844673  | -1.3212859 | 2.3178255  |
| C | 4.2582798  | 0.0564096  | 2.2149338  |
| C | -0.0917809 | 3.7318210  | -2.2609824 |
| C | 2.0885276  | 2.6960259  | -2.0125430 |
| C | 0.3021735  | 4.7568545  | -1.3819243 |
| C | 2.4719825  | 3.7140615  | -1.1257621 |
| C | 1.5790318  | 4.7389036  | -0.7922002 |
| C | -2.8587683 | 3.0535842  | -0.0663349 |
| C | -2.9359070 | 1.4597619  | 1.7635537  |
| H | 3.5163166  | 0.4869814  | -1.1012778 |
| H | 3.3084352  | -3.1162144 | 1.2825993  |
| O | 4.2727024  | -1.9138272 | 3.5336545  |
| H | 4.6010893  | 0.5989346  | 3.1074440  |
| H | -1.0858322 | 3.7523173  | -2.7310835 |
| H | 2.8014190  | 1.9080976  | -2.2867738 |
| H | 3.4792016  | 3.7040617  | -0.6837456 |
| H | 1.8502749  | 5.5410721  | -0.0919046 |
| C | -2.4350980 | 2.4447216  | 2.6326766  |
| C | -2.3568248 | 4.0360627  | 0.8050449  |
| C | -2.1214567 | 3.7241310  | 2.1594878  |
| H | -3.0582465 | 3.2874139  | -1.1207853 |
| H | -3.1753193 | 0.4607937  | 2.1464990  |
| H | -2.2836901 | 2.2091952  | 3.6972397  |
| H | -1.7130656 | 4.5013502  | 2.8201857  |
| H | -2.5476636 | -4.4123302 | 2.8728804  |
| H | -0.9469487 | -5.1468544 | 2.5154676  |
| H | -2.2577886 | -5.1991490 | 1.2854432  |
| H | 4.1987097  | -3.8704160 | -0.8956403 |
| H | 4.8480245  | -2.5873820 | -1.9689167 |
| H | 3.6278056  | -3.7465971 | -2.5951576 |
| H | -0.3245468 | 2.9711312  | -5.0832914 |
| H | 0.1413727  | 1.3598719  | -5.7343925 |
| H | 1.4076528  | 2.5233466  | -5.2203279 |
| H | -5.2560815 | 2.0149471  | -1.3198789 |
| H | -5.7369637 | 0.9745309  | 0.0654069  |
| H | -5.5894628 | 0.2700230  | -1.5795275 |



|    |            |            |            |
|----|------------|------------|------------|
| O  | -0.4803272 | 5.8635584  | -1.1056159 |
| O  | -2.1307158 | 5.3460379  | 0.4466113  |
| O  | 2.3604639  | -2.2514933 | 4.8130149  |
| H  | 4.3082365  | 1.7695699  | 0.8898274  |
| H  | 0.8427035  | -1.6500240 | 0.6289704  |
| H  | 0.6166569  | -0.4934534 | -1.6578374 |
| H  | -1.0782446 | 1.5999474  | -1.1519236 |
| H  | -1.4640011 | -0.6805630 | 0.3955617  |
| C  | -1.8661420 | 5.7104843  | -0.8965458 |
| C  | 3.3951730  | -2.8764396 | 4.0741372  |
| H  | -2.3204949 | 4.9996046  | -1.6145432 |
| H  | -2.3038144 | 6.7148423  | -1.0388384 |
| H  | 3.9906215  | -3.4503662 | 4.8060145  |
| H  | 2.9953248  | -3.5600495 | 3.2992098  |
| H  | 1.6040413  | 0.5197689  | 2.6728652  |
| C  | 0.8385791  | 1.2469693  | 2.3516330  |
| Cl | 1.4906644  | 2.8856030  | 2.4827877  |
| H  | -0.0998954 | 1.1696315  | 2.9246431  |
| Cl | 0.4265217  | 0.8319911  | 0.6335225  |

## 2bC4

Energy = -4002.328945938

|   |            |            |            |
|---|------------|------------|------------|
| C | -0.3388800 | -5.7195226 | -0.1179177 |
| C | 0.7509699  | -5.7242428 | -1.0473277 |
| C | -0.6772082 | -4.3878450 | 0.1238976  |
| C | 1.0532757  | -4.3961417 | -1.3513722 |
| N | 0.1682458  | -3.6062736 | -0.6408558 |
| C | -1.6728811 | -3.7682025 | 1.0890098  |
| C | -2.7345247 | -2.9689292 | 0.3437850  |
| C | 2.1610355  | -3.8031131 | -2.2019031 |
| C | 1.6204221  | -2.8191920 | -3.2297477 |
| C | -3.6572375 | -1.1519458 | -0.6836676 |
| N | 1.2107905  | -1.5521124 | -2.8608623 |
| C | 0.9434648  | -0.7729637 | -3.9690500 |
| C | 1.5798838  | -2.8681184 | -4.6250300 |
| C | 1.1520473  | -1.5824065 | -5.0908603 |
| C | 0.4695749  | 0.6705984  | -3.8675785 |
| H | -0.8259851 | -6.5975742 | 0.3191510  |
| H | 1.2515751  | -6.6073767 | -1.4577119 |
| C | -2.3705959 | -4.8977330 | 1.8853258  |
| C | 2.8970556  | -4.9488997 | -2.9327320 |
| H | 1.8531069  | -3.7278116 | -5.2456401 |
| H | 1.0192730  | -1.2796352 | -6.1349603 |
| C | 1.1539629  | 1.4401308  | -2.7059682 |
| C | 0.8104842  | 1.4043411  | -5.1856576 |
| C | -3.7418047 | 0.2950364  | -1.1465781 |
| C | -2.9290434 | 0.5352088  | -2.4043918 |
| N | -1.5713375 | 0.2854082  | -2.4442439 |
| C | -1.0331501 | 0.7052876  | -3.6451856 |
| C | -3.2761183 | 1.1112363  | -3.6271498 |
| C | -2.0807785 | 1.2170842  | -4.4111947 |
| C | -3.2614875 | 1.2485112  | -0.0184815 |
| C | -5.2210989 | 0.6423345  | -1.4378201 |
| H | -4.2833250 | 1.4122937  | -3.9326322 |
| H | -1.9981251 | 1.6248328  | -5.4242286 |
| N | -2.5225616 | -1.6692552 | -0.0810350 |
| C | -4.0386213 | -3.3054938 | -0.0246915 |
| C | -4.6174323 | -2.1652906 | -0.6686174 |
| H | -4.5304303 | -4.2667896 | 0.1583797  |
| H | -5.6343115 | -2.0903641 | -1.0666977 |
| C | -0.9251484 | -2.8827034 | 2.1200775  |
| C | -1.5847280 | -1.8419205 | 2.8030621  |
| C | 0.4136428  | -3.1758274 | 2.4478526  |
| C | -0.9047711 | -1.0981386 | 3.7821584  |

|   |            |            |            |
|---|------------|------------|------------|
| C | 1.0949902  | -2.4186480 | 3.4139279  |
| C | 0.4343670  | -1.3738325 | 4.0888813  |
| H | -2.6322936 | -1.6121444 | 2.5676821  |
| H | 0.9024549  | -4.0116329 | 1.9316983  |
| H | -1.4262367 | -0.2847912 | 4.3092827  |
| H | 0.9870336  | -0.7940224 | 4.8411643  |
| C | 3.1928615  | -3.0480780 | -1.3206355 |
| C | 4.1258276  | -2.1812000 | -1.9252669 |
| C | 3.2050727  | -3.2061781 | 0.0745482  |
| C | 5.0439646  | -1.4748982 | -1.1345554 |
| C | 4.0987881  | -2.4652439 | 0.8627335  |
| C | 5.0338305  | -1.6065512 | 0.2619257  |
| C | 0.4917933  | 2.5698721  | -2.1748411 |
| C | 2.4130111  | 1.0839602  | -2.1915587 |
| C | 1.0594831  | 3.3057420  | -1.1232569 |
| C | 2.9729455  | 1.8157661  | -1.1290473 |
| C | 2.3076305  | 2.9212576  | -0.5877919 |
| C | -2.6040297 | 2.4518164  | -0.3427548 |
| C | -3.5601269 | 0.9713853  | 1.3304112  |
| H | 4.1155703  | -2.0499299 | -3.0175601 |
| H | 2.4617614  | -3.8724921 | 0.5251783  |
| O | 4.1164234  | -2.4701722 | 2.2501626  |
| H | 5.7259485  | -1.0343797 | 0.8963845  |
| H | -0.4771772 | 2.8501559  | -2.6095255 |
| H | 2.9519576  | 0.2149820  | -2.5885667 |
| H | 3.9378168  | 1.4986778  | -0.7065616 |
| H | 2.7291792  | 3.4968552  | 0.2474082  |
| C | -3.2093727 | 1.8913174  | 2.3329976  |
| C | -2.2404807 | 3.3629006  | 0.6648623  |
| C | -2.5462360 | 3.0851202  | 2.0112899  |
| H | -2.4020974 | 2.6607913  | -1.4012411 |
| H | -4.0800564 | 0.0377554  | 1.5890506  |
| H | -3.4495816 | 1.6730242  | 3.3847372  |
| H | -2.2591746 | 3.8105389  | 2.7856243  |
| H | -3.1054819 | -4.4660697 | 2.5908077  |
| H | -1.6234749 | -5.4757364 | 2.4618596  |
| H | -2.8999134 | -5.5922865 | 1.2048334  |
| H | 3.3410165  | -5.6459133 | -2.1969996 |
| H | 3.7109637  | -4.5434985 | -3.5627464 |
| H | 2.1969066  | -5.5149310 | -3.5773692 |
| H | 0.4844709  | 2.4602244  | -5.1307360 |
| H | 0.3025807  | 0.9291932  | -6.0471493 |
| H | 1.9024112  | 1.3776504  | -5.3619716 |
| H | -5.3116185 | 1.7040975  | -1.7349630 |
| H | -5.8384812 | 0.4777562  | -0.5351833 |
| H | -5.6115422 | 0.0113440  | -2.2595365 |

|   |            |            |            |
|---|------------|------------|------------|
| O | 0.4947990  | 4.4294144  | -0.5507835 |
| O | -1.6115253 | 4.5700173  | 0.4303475  |
| O | 2.4000619  | -2.6421308 | 3.8105240  |
| H | 5.7710108  | -0.7983760 | -1.6093096 |
| H | 0.2207644  | -2.5755521 | -0.5632128 |
| H | 1.1201425  | -1.2186309 | -1.8881300 |
| H | -0.9952554 | -0.0327696 | -1.6456482 |
| H | -1.6198132 | -1.1766419 | 0.0120623  |
| C | -0.8587693 | 4.7932527  | -0.7476790 |
| C | 3.3174603  | -3.3631413 | 3.0227101  |
| C | 2.1113706  | 0.3972162  | 2.1008439  |
| N | 1.8872485  | -0.4766316 | 1.0773156  |
| C | 0.6961495  | -0.1566415 | 0.5659823  |
| C | 0.0971417  | 1.0385684  | 1.2819093  |
| N | 1.1276456  | 1.3173375  | 2.2674410  |
| O | 0.1098296  | -0.7571489 | -0.3887097 |
| N | 3.2216462  | 0.3156826  | 2.8416521  |
| C | 0.9453666  | 2.2853085  | 3.3373518  |
| C | 1.0014532  | 3.7332222  | 2.8425971  |
| C | 0.5396897  | 4.7469173  | 3.8922100  |
| C | 0.4239584  | 6.1672052  | 3.3276446  |
| C | -0.0443898 | 7.2060320  | 4.3534217  |
| C | -0.1812615 | 8.6157131  | 3.7699990  |
| H | -0.8742485 | 0.7913683  | 1.7572692  |
| H | -0.0646862 | 1.8763546  | 0.5775614  |
| H | 3.3476914  | 0.8909548  | 3.6739658  |
| H | 3.7454106  | -0.5690921 | 2.7721141  |
| H | -0.0429811 | 2.0846239  | 3.8080044  |
| H | 1.7054049  | 2.0980049  | 4.1227605  |
| H | 0.3624753  | 3.8313423  | 1.9418649  |
| H | 2.0349895  | 3.9675784  | 2.5092315  |
| H | -0.4513093 | 4.4324439  | 4.2925321  |
| H | 1.2309928  | 4.7386937  | 4.7649666  |
| H | -0.2800344 | 6.1497137  | 2.4654046  |
| H | 1.4069770  | 6.4781871  | 2.9070328  |
| H | -1.0201061 | 6.8811866  | 4.7794607  |
| H | 0.6666527  | 7.2211731  | 5.2098954  |
| H | -0.9144852 | 8.6350742  | 2.9358910  |
| H | 0.7869502  | 8.9797851  | 3.3661182  |
| H | -0.5210389 | 9.3455097  | 4.5328694  |
| H | -1.3031387 | 4.2903573  | -1.6271986 |
| H | -0.8735929 | 5.8878236  | -0.8975571 |
| H | 4.0003370  | -3.8561074 | 3.7395489  |
| H | 2.8324397  | -4.1242959 | 2.3848214  |
| H | -2.0432264 | -2.4933358 | -2.2936100 |
| C | -1.9177022 | -2.8837870 | -3.3155260 |

|    |            |            |            |
|----|------------|------------|------------|
| Cl | -1.8128046 | -4.6684490 | -3.2166435 |
| H  | -0.9993573 | -2.5114797 | -3.7989564 |
| Cl | -3.3172432 | -2.3278863 | -4.2909028 |

ii

Energy = -4018.684515082

|   |            |            |            |
|---|------------|------------|------------|
| C | -1.2165260 | 3.7904400  | -1.1867187 |
| C | -2.3580983 | 4.5521167  | -0.9292258 |
| H | -2.4233934 | 5.6441449  | -0.9757471 |
| C | -3.4143634 | 3.6510125  | -0.5739647 |
| H | -4.4365281 | 3.9245714  | -0.2921079 |
| C | -2.8994091 | 2.3551149  | -0.6198839 |
| C | -3.4860434 | 1.0274672  | -0.1699708 |
| C | -2.9747023 | 0.6784026  | 1.2520617  |
| C | -2.2433335 | 1.5982686  | 2.0252132  |
| H | -2.0674654 | 2.6061264  | 1.6317585  |
| C | -1.7307747 | 1.2384119  | 3.2810617  |
| H | -1.1376782 | 1.9638652  | 3.8564393  |
| C | -1.9591381 | -0.0382614 | 3.8100553  |
| H | -1.5516952 | -0.3474446 | 4.7807371  |
| C | -2.7363648 | -0.9375028 | 3.0604578  |
| C | -3.2343663 | -0.5976799 | 1.7947587  |
| H | -3.8194744 | -1.3455842 | 1.2398594  |
| C | -3.1087415 | -4.4667575 | 4.9568601  |
| C | -2.8673403 | -4.7529028 | 6.3158926  |
| H | -2.0254199 | -4.2679579 | 6.8315277  |
| C | -3.7055878 | -5.6526638 | 6.9929010  |
| H | -3.5215608 | -5.8784391 | 8.0538550  |
| C | -4.7752624 | -6.2616301 | 6.3144671  |
| H | -5.4315767 | -6.9662034 | 6.8472621  |
| C | -5.0118560 | -5.9754557 | 4.9567516  |
| H | -5.8494190 | -6.4558144 | 4.4293216  |
| C | -4.1810323 | -5.0774624 | 4.2713064  |
| H | -4.3637070 | -4.8528659 | 3.2104551  |
| C | -5.0295462 | 1.1395377  | -0.1278400 |
| H | -5.3393060 | 1.9068188  | 0.6070962  |
| H | -5.4762269 | 0.1718470  | 0.1688909  |
| H | -5.4293979 | 1.4247782  | -1.1199925 |
| C | -3.0794627 | -0.0785302 | -1.1367753 |
| C | -3.6262049 | -0.4829206 | -2.3547474 |
| H | -4.4938151 | -0.0304091 | -2.8480215 |
| C | -2.8543297 | -1.5899404 | -2.8355044 |
| H | -3.0128933 | -2.1385845 | -3.7705904 |
| C | -1.8493745 | -1.8443045 | -1.9018241 |
| C | -0.7132036 | -2.8630617 | -1.9077274 |
| C | -0.1965488 | -3.0810013 | -0.4648964 |
| O | 5.8301106  | 2.4221686  | 0.0537802  |
| O | 4.6634937  | 4.2650774  | 0.8578344  |

|   |            |            |            |
|---|------------|------------|------------|
| C | -1.1107349 | -3.4537399 | 0.5427173  |
| H | -2.1776011 | -3.5981401 | 0.3189108  |
| C | -0.6686377 | -3.6562554 | 1.8576042  |
| C | 0.6736560  | -3.4569104 | 2.2201401  |
| H | 0.9823749  | -3.5869609 | 3.2651393  |
| C | 1.5843112  | -3.1072934 | 1.2141538  |
| H | 2.6460169  | -2.9720906 | 1.4700506  |
| C | 1.1597834  | -2.9344565 | -0.1138261 |
| H | 1.8933954  | -2.6680882 | -0.8836350 |
| C | -1.2297256 | -4.2139819 | -2.4582517 |
| H | -2.0581360 | -4.5951061 | -1.8324121 |
| H | -0.4149134 | -4.9635824 | -2.4613317 |
| H | -1.6016316 | -4.0974754 | -3.4939995 |
| C | 0.3855644  | -2.3458301 | -2.8164477 |
| C | 1.0018257  | -2.8959266 | -3.9396827 |
| H | 0.7665421  | -3.8650071 | -4.3919422 |
| C | 1.9915708  | -1.9622763 | -4.3926493 |
| H | 2.6638235  | -2.0907804 | -5.2471407 |
| C | 1.9577225  | -0.8608993 | -3.5365601 |
| C | 2.8566746  | 0.3564612  | -3.4304154 |
| C | 3.7097086  | 0.2674464  | -2.1383071 |
| C | 3.9919740  | -0.9784046 | -1.5458327 |
| H | 3.5694528  | -1.8939968 | -1.9828614 |
| C | 4.8376285  | -1.0514032 | -0.4248458 |
| H | 5.0531146  | -2.0275594 | 0.0355511  |
| C | 5.4117926  | 0.1069620  | 0.1145214  |
| H | 6.0708146  | 0.0693866  | 0.9933866  |
| C | 5.1530591  | 1.3548633  | -0.4894144 |
| C | 4.2991753  | 1.4325358  | -1.6059098 |
| H | 4.1020711  | 2.3918207  | -2.1009637 |
| C | 5.4468702  | 3.7621794  | -0.2017705 |
| H | 6.3791797  | 4.3539813  | -0.1942120 |
| H | 4.9443427  | 3.8689567  | -1.1830559 |
| C | 3.8371095  | 0.3648728  | -4.6278009 |
| H | 4.4749334  | -0.5386179 | -4.6034056 |
| H | 4.4881258  | 1.2577736  | -4.5792414 |
| H | 3.2867987  | 0.3781882  | -5.5882098 |
| C | 2.0386478  | 1.6389076  | -3.4487484 |
| C | 1.7668091  | 2.5369103  | -4.4809367 |
| H | 2.0881645  | 2.4317702  | -5.5226013 |
| C | 1.0119073  | 3.6237838  | -3.9303276 |
| H | 0.6529691  | 4.5065698  | -4.4701157 |
| C | 0.8349006  | 3.3715309  | -2.5709348 |
| C | 0.2184168  | 4.2096000  | -1.4606858 |
| C | 1.0863537  | 4.0644053  | -0.1796723 |
| C | 2.4893356  | 4.1801996  | -0.2804205 |

|    |            |            |            |
|----|------------|------------|------------|
| H  | 2.9425309  | 4.3774029  | -1.2627018 |
| C  | 3.2953068  | 4.0714033  | 0.8670835  |
| C  | 2.7119714  | 3.8301364  | 2.1266798  |
| H  | 3.3652243  | 3.7261713  | 3.0043755  |
| C  | 1.3178635  | 3.7387039  | 2.2283981  |
| H  | 0.8556656  | 3.5568278  | 3.2096234  |
| C  | 0.5098277  | 3.8613312  | 1.0861570  |
| H  | -0.5809644 | 3.7972829  | 1.1748124  |
| C  | 0.2316770  | 5.7005252  | -1.8768698 |
| H  | 1.2624394  | 6.0240514  | -2.1140570 |
| H  | -0.1496747 | 6.3303409  | -1.0509749 |
| H  | -0.4060527 | 5.8652366  | -2.7664500 |
| N  | -1.5758390 | 2.4668900  | -1.0049289 |
| H  | -0.9593642 | 1.6717646  | -1.1761145 |
| N  | -1.9821934 | -0.8951005 | -0.9033393 |
| H  | -1.4934371 | -0.9485020 | -0.0047809 |
| N  | 0.9657234  | -1.1080559 | -2.6059079 |
| H  | 0.7638792  | -0.5141040 | -1.7984719 |
| N  | 1.4301254  | 2.1459766  | -2.3109513 |
| H  | 1.5943696  | 1.7936621  | -1.3641140 |
| O  | -3.0944167 | -2.1854106 | 3.5713063  |
| O  | -0.8718407 | -2.7452515 | 4.9525626  |
| O  | -1.5961335 | -4.1316618 | 2.7854824  |
| P  | -2.0163657 | -3.2976168 | 4.1499592  |
| H  | 2.6416615  | 1.3587397  | 1.2792423  |
| C  | 2.1677793  | 0.3702589  | 1.4073854  |
| Cl | 0.6060459  | 0.4233268  | 0.4856412  |
| Cl | 1.8927908  | 0.0739667  | 3.1294383  |
| H  | 2.7634274  | -0.4494101 | 0.9728413  |



**2b<1i**

Energy = -4611.124955087

|   |            |            |            |
|---|------------|------------|------------|
| C | -1.4648713 | 3.3610792  | -2.0614014 |
| C | -2.6821958 | 4.0433884  | -2.0908527 |
| H | -2.8264578 | 5.0873776  | -2.3871099 |
| C | -3.7007574 | 3.1309593  | -1.6681302 |
| H | -4.7715312 | 3.3439518  | -1.5856576 |
| C | -3.0832449 | 1.9112321  | -1.3901204 |
| C | -3.6500864 | 0.6025785  | -0.8688078 |
| C | -2.9856659 | 0.1973179  | 0.4727414  |
| C | -2.2360931 | 1.1052747  | 1.2472129  |
| H | -2.0609289 | 2.1216609  | 0.8722772  |
| C | -1.7140836 | 0.7269381  | 2.4963035  |
| H | -1.1296396 | 1.4508679  | 3.0829958  |
| C | -1.9423238 | -0.5571989 | 3.0116032  |
| H | -1.5532875 | -0.8697884 | 3.9898169  |
| C | -2.7008611 | -1.4516423 | 2.2418234  |
| C | -3.2071764 | -1.0960591 | 0.9863499  |
| H | -3.7979166 | -1.8299267 | 0.4203929  |
| C | -3.1210417 | -5.1189480 | 3.8526828  |
| C | -2.5810606 | -5.6974856 | 5.0192579  |
| H | -1.5497800 | -5.4593321 | 5.3180966  |
| C | -3.3689843 | -6.5708185 | 5.7855503  |
| H | -2.9528227 | -7.0245983 | 6.6971441  |
| C | -4.6848575 | -6.8626270 | 5.3875248  |
| H | -5.3008254 | -7.5471526 | 5.9901862  |
| C | -5.2198591 | -6.2832069 | 4.2217864  |
| H | -6.2506579 | -6.5134466 | 3.9141320  |
| C | -4.4422847 | -5.4091414 | 3.4489960  |
| H | -4.8599465 | -4.9538551 | 2.5393648  |
| C | -5.1616259 | 0.7948340  | -0.5925130 |
| H | -5.3131593 | 1.5788620  | 0.1736486  |
| H | -5.6081196 | -0.1492003 | -0.2281945 |
| H | -5.6925214 | 1.1008546  | -1.5146716 |
| C | -3.4734993 | -0.5080102 | -1.8983580 |
| C | -4.3441138 | -1.0091807 | -2.8700260 |
| H | -5.3600868 | -0.6525237 | -3.0694018 |
| C | -3.6669971 | -2.0757705 | -3.5462629 |
| H | -4.0716838 | -2.6969227 | -4.3524321 |
| C | -2.3959684 | -2.1993127 | -2.9743424 |
| C | -1.2691139 | -3.1910665 | -3.2273112 |
| C | -0.7439912 | -3.7387466 | -1.8754504 |
| O | 5.2760661  | 1.8838572  | -0.1419253 |
| O | 4.1565150  | 3.8143511  | 0.5225567  |

|   |            |            |            |
|---|------------|------------|------------|
| C | -1.6336476 | -3.9440081 | -0.8055079 |
| H | -2.7007352 | -3.7029992 | -0.9051150 |
| C | -1.1608586 | -4.4579353 | 0.4055954  |
| C | 0.1899630  | -4.7816920 | 0.5956588  |
| H | 0.5332099  | -5.1704974 | 1.5632841  |
| C | 1.0718081  | -4.5918022 | -0.4785045 |
| H | 2.1356141  | -4.8472200 | -0.3578931 |
| C | 0.6110848  | -4.0827248 | -1.7026301 |
| H | 1.3072319  | -3.9553681 | -2.5440275 |
| C | -1.8200185 | -4.3828479 | -4.0439370 |
| H | -2.6635176 | -4.8548728 | -3.5059056 |
| H | -1.0291736 | -5.1417057 | -4.1942419 |
| H | -2.1753740 | -4.0460231 | -5.0373287 |
| C | -0.1169911 | -2.5576219 | -3.9898623 |
| C | 0.5572826  | -2.9771735 | -5.1374806 |
| H | 0.2641277  | -3.8077155 | -5.7879123 |
| C | 1.7013262  | -2.1326792 | -5.2986454 |
| H | 2.4337897  | -2.1795972 | -6.1108382 |
| C | 1.7006980  | -1.2151961 | -4.2462613 |
| C | 2.6552860  | -0.0782531 | -3.9246740 |
| C | 3.2599486  | -0.1986347 | -2.5011672 |
| C | 3.1710854  | -1.3706681 | -1.7303248 |
| H | 2.6153976  | -2.2355112 | -2.1114220 |
| C | 3.7735170  | -1.4312547 | -0.4603901 |
| H | 3.6793563  | -2.3468052 | 0.1423006  |
| C | 4.4696720  | -0.3322640 | 0.0558211  |
| H | 4.9371730  | -0.3576520 | 1.0501402  |
| C | 4.5557277  | 0.8497069  | -0.7092966 |
| C | 3.9633991  | 0.9098294  | -1.9810317 |
| H | 4.0364168  | 1.8180524  | -2.5953426 |
| C | 4.9956242  | 3.2333063  | -0.4592192 |
| H | 5.9577494  | 3.7709152  | -0.3856248 |
| H | 4.5802296  | 3.3468887  | -1.4783656 |
| C | 3.8246728  | -0.1186759 | -4.9373592 |
| H | 4.3659087  | -1.0801327 | -4.8544516 |
| H | 4.5339418  | 0.7064977  | -4.7407503 |
| H | 3.4479203  | -0.0165311 | -5.9733133 |
| C | 1.9519232  | 1.2680601  | -4.0328972 |
| C | 2.0009968  | 2.2607225  | -5.0105259 |
| H | 2.5436350  | 2.2004880  | -5.9593881 |
| C | 1.2263772  | 3.3697972  | -4.5397790 |
| H | 1.0735736  | 4.3210844  | -5.0594686 |
| C | 0.7192719  | 3.0338724  | -3.2827360 |
| C | -0.0471094 | 3.8654356  | -2.2686111 |
| C | 0.7028004  | 3.8940699  | -0.9071708 |
| C | 2.1073223  | 3.7797737  | -0.8593320 |

|   |            |            |            |
|---|------------|------------|------------|
| H | 2.6492041  | 3.6096758  | -1.7986368 |
| C | 2.7884630  | 3.8931913  | 0.3675749  |
| C | 2.0703230  | 4.1444081  | 1.5539049  |
| H | 2.6252612  | 4.2394278  | 2.4979246  |
| C | 0.6754792  | 4.2691021  | 1.5030390  |
| H | 0.1135595  | 4.4679724  | 2.4281676  |
| C | -0.0105978 | 4.1347362  | 0.2845314  |
| H | -1.1049297 | 4.2359057  | 0.2452740  |
| C | -0.1089683 | 5.3273115  | -2.7733750 |
| H | 0.9135874  | 5.7214200  | -2.9243682 |
| H | -0.6216018 | 5.9667395  | -2.0308662 |
| H | -0.6619628 | 5.3832206  | -3.7306889 |
| N | -1.7345345 | 2.0699927  | -1.6467705 |
| H | -1.0311522 | 1.3381589  | -1.4497954 |
| N | -2.3056011 | -1.2367018 | -1.9892406 |
| H | -1.4592427 | -1.0454254 | -1.4240699 |
| N | 0.5831819  | -1.4813207 | -3.4780985 |
| H | 0.3786612  | -1.0267017 | -2.5720174 |
| N | 1.1582577  | 1.7495196  | -3.0058746 |
| H | 0.9224797  | 1.2008512  | -2.1621578 |
| O | -3.0571619 | -2.6970901 | 2.7727845  |
| O | -0.7046730 | -3.7562078 | 3.4661584  |
| O | -2.1072575 | -4.6997223 | 1.4120202  |
| P | -2.0826126 | -4.0123075 | 2.9017441  |
| C | 0.5540194  | -0.2418701 | 0.0482279  |
| C | 1.1671286  | -1.0646123 | 1.9457216  |
| C | 1.3999788  | 0.8250246  | 0.7113585  |
| H | 2.2648436  | 1.1094795  | 0.0805310  |
| H | 0.7978813  | 1.7373418  | 0.9095335  |
| C | 2.5859784  | 0.7554130  | 2.9807096  |
| C | 1.7397229  | 1.5192625  | 4.0065051  |
| H | 3.3106426  | 1.4384139  | 2.4904148  |
| H | 3.1950527  | -0.0317287 | 3.4745893  |
| N | 0.4322522  | -1.3263262 | 0.8201405  |
| N | 1.7949689  | 0.1428119  | 1.9264710  |
| N | 1.2682861  | -1.9349507 | 2.9501626  |
| H | 1.7383897  | -1.6601403 | 3.8126137  |
| H | 0.5696807  | -2.7085114 | 3.0142098  |
| O | 0.0397686  | -0.0714343 | -1.1034817 |
| H | 1.0378808  | 0.8139664  | 4.5028957  |
| H | 1.1100052  | 2.2534783  | 3.4606636  |
| C | 2.5858219  | 2.2445381  | 5.0546861  |
| H | 3.3050812  | 2.9214475  | 4.5400910  |
| H | 3.2107244  | 1.5064972  | 5.6059740  |
| C | 1.7473192  | 3.0527142  | 6.0508355  |
| H | 1.0200008  | 2.3750178  | 6.5532031  |

|    |            |            |            |
|----|------------|------------|------------|
| H  | 1.1308784  | 3.7934029  | 5.4920534  |
| C  | 2.5806213  | 3.7809940  | 7.1123228  |
| H  | 3.3055820  | 4.4564621  | 6.6050888  |
| H  | 3.1977110  | 3.0365895  | 7.6637824  |
| C  | 1.7327506  | 4.5837492  | 8.1038306  |
| H  | 1.0213620  | 3.9275797  | 8.6485825  |
| H  | 1.1333615  | 5.3599264  | 7.5830544  |
| H  | 2.3611126  | 5.0969563  | 8.8598106  |
| H  | -0.7745782 | 0.9697413  | -4.1123253 |
| C  | -1.5747708 | 0.6320493  | -4.7880663 |
| Cl | -0.8126350 | 0.1679247  | -6.3441382 |
| Cl | -2.7525242 | 1.9708216  | -4.9595228 |
| H  | -2.1125571 | -0.2500474 | -4.4012347 |

**2b**

Energy = -592.3662703110

|   |            |            |            |
|---|------------|------------|------------|
| C | -2.2261080 | -2.5514426 | -0.6618734 |
| N | -2.1922095 | -3.8512758 | -1.0015482 |
| N | -1.4506451 | -1.7213302 | -1.4230601 |
| C | -1.2962248 | -3.9601531 | -2.0456764 |
| C | -0.7175782 | -2.5560538 | -2.3606779 |
| O | -0.9872424 | -4.9898571 | -2.6482873 |
| C | -1.1417852 | -0.3268540 | -1.1445339 |
| N | -2.9607382 | -2.0931761 | 0.3703870  |
| H | -3.6043303 | -2.7410364 | 0.8241936  |
| H | -3.0844762 | -1.0966636 | 0.5425362  |
| H | -0.9014449 | -2.2697462 | -3.4178343 |
| H | 0.3797541  | -2.5365664 | -2.1810744 |
| H | -0.8551607 | 0.1487031  | -2.1051543 |
| C | -0.0327672 | -0.1329613 | -0.0999618 |
| C | 0.3115268  | 1.3416181  | 0.1317662  |
| C | 1.4288822  | 1.5513409  | 1.1600170  |
| C | 1.8011952  | 3.0232857  | 1.3775210  |
| C | 2.9301661  | 3.2198730  | 2.3939693  |
| H | -2.0730913 | 0.1895258  | -0.8234592 |
| H | 0.8748262  | -0.6822913 | -0.4333178 |
| H | -0.3499605 | -0.6035590 | 0.8564683  |
| H | 0.6102905  | 1.8052578  | -0.8357481 |
| H | -0.6015986 | 1.8883292  | 0.4604306  |
| H | 2.3336957  | 0.9881937  | 0.8358291  |
| H | 1.1251558  | 1.0995019  | 2.1317466  |
| H | 2.0941692  | 3.4707666  | 0.4012145  |
| H | 0.8975550  | 3.5838999  | 1.7069885  |
| H | 3.8559539  | 2.6979345  | 2.0714870  |
| H | 2.6514906  | 2.8129147  | 3.3890335  |
| H | 3.1806999  | 4.2918222  | 2.5286187  |

## Computed thermodynamic parameters of complexes **2b**⊂**3io** and **2b**⊂**3oo**

Frequency calculations at BP86 def2-SVP level of theory have been performed using ORCA version 4.1.2.<sup>4</sup> The D4 dispersion correction and RI approximation were applied. The optimization of the geometries was done in CH<sub>2</sub>Cl<sub>2</sub> after the application of the conductor-like polarizable continuum model (CPCM) implemented in ORCA.

**Table S 1.** Computed thermodynamic parameters at 288 K for the formation of the 1:1 complexes **2b**⊂**3io** and **2b**⊂**3oo**.  $\Delta H$  enthalpy (kcal·mol<sup>-1</sup>),  $T\Delta S$  entropy (kcal·mol<sup>-1</sup>) and free energy  $\Delta G$  (kcal·mol<sup>-1</sup>).

|                        | $\Delta H$ | $T\Delta S$ | $\Delta G$ |
|------------------------|------------|-------------|------------|
| <b>2b</b> ⊂ <b>3io</b> | -40.39     | -16.92      | -23.47     |
| <b>2b</b> ⊂ <b>3oo</b> | -37.96     | -18.18      | -19.78     |

## References

---

<sup>1</sup> M. Ciardi, F. Tancini, G. Gil-Ramírez, E. C. Escudero Adán, C. Massera, E. Dalcanale and P. Ballester, Switching from Separated to Contact Ion-Pair Binding Modes with Diastereomeric Calix[4]pyrrole Bis-phosphonate Receptors, *J. Am. Chem. Soc.*, 2012, **134**, 13121-13132.

<sup>2</sup> T. Guinovart, D. Hernández-Alonso, L. Adriaenssens, P. Blondeau, M. Martínez-Belmonte, F. X. Rius, F. J. Andrade and P. Ballester, Recognition and Sensing of Creatinine, *Angew. Chem., Int. Ed.*, 2016, **55**, 2435-2440.

<sup>3</sup> A. F. Sierra, D. Hernández-Alonso, M. A. Romero, J. A. González-Delgado, U. Pischel and P. Ballester, Optical Supramolecular Sensing of Creatinine, *J. Am. Chem. Soc.*, 2020, **142**, 4276-4284.

<sup>4</sup> F. Neese, The ORCA program system, *WIREs Computational Molecular Science*, 2012, **2**, 73-78.
